# Supplementary material for: Multiple cullin-associated E3 ligases regulate cyclin D1 protein stability
Source: eLife. 2023 Nov 9;12:e80327. doi: 10.7554/eLife.80327 (PMC10651173; doi:10.7554/eLife.80327)
Supplement: Figure 2—source data 1. [file elife-80327-fig2-data1.xlsx]

## Sheet: Sheet1
Source Data-Figure 2C, 2F, 2I and 2L
Figure 2C					Figure 2F
Cyclin D1 WT		Cyclin D1 T286A			Cyclin D1 WT		Cyclin D1 T286A
Ctr	Keap1	Ctr	Keap1		Ctr	DDB2	Ctr	DDB2
20	10	28	25		21	7	24	23
17	7	24	22		17	6	26	17
26	4	21	21		22	2	20	20
Figure 2I					Figure 2L
Cyclin D1 WT		Cyclin D1 T286A			Cyclin D1 WT		Cyclin D1 T286A
Ctr	WSB2	Ctr	WSB2		Ctr	Rbx1	Ctr	Rbx1
25	10	24	21		15	7	24	19
16	8	22	18		22	7	21	27
19	10	27	24		26	5	20	23
