# Supplementary material for: Multiple cullin-associated E3 ligases regulate cyclin D1 protein stability
Source: eLife journal article supplement (doi:10.7554/elife.80327), 2023-11-09

Figure 1A

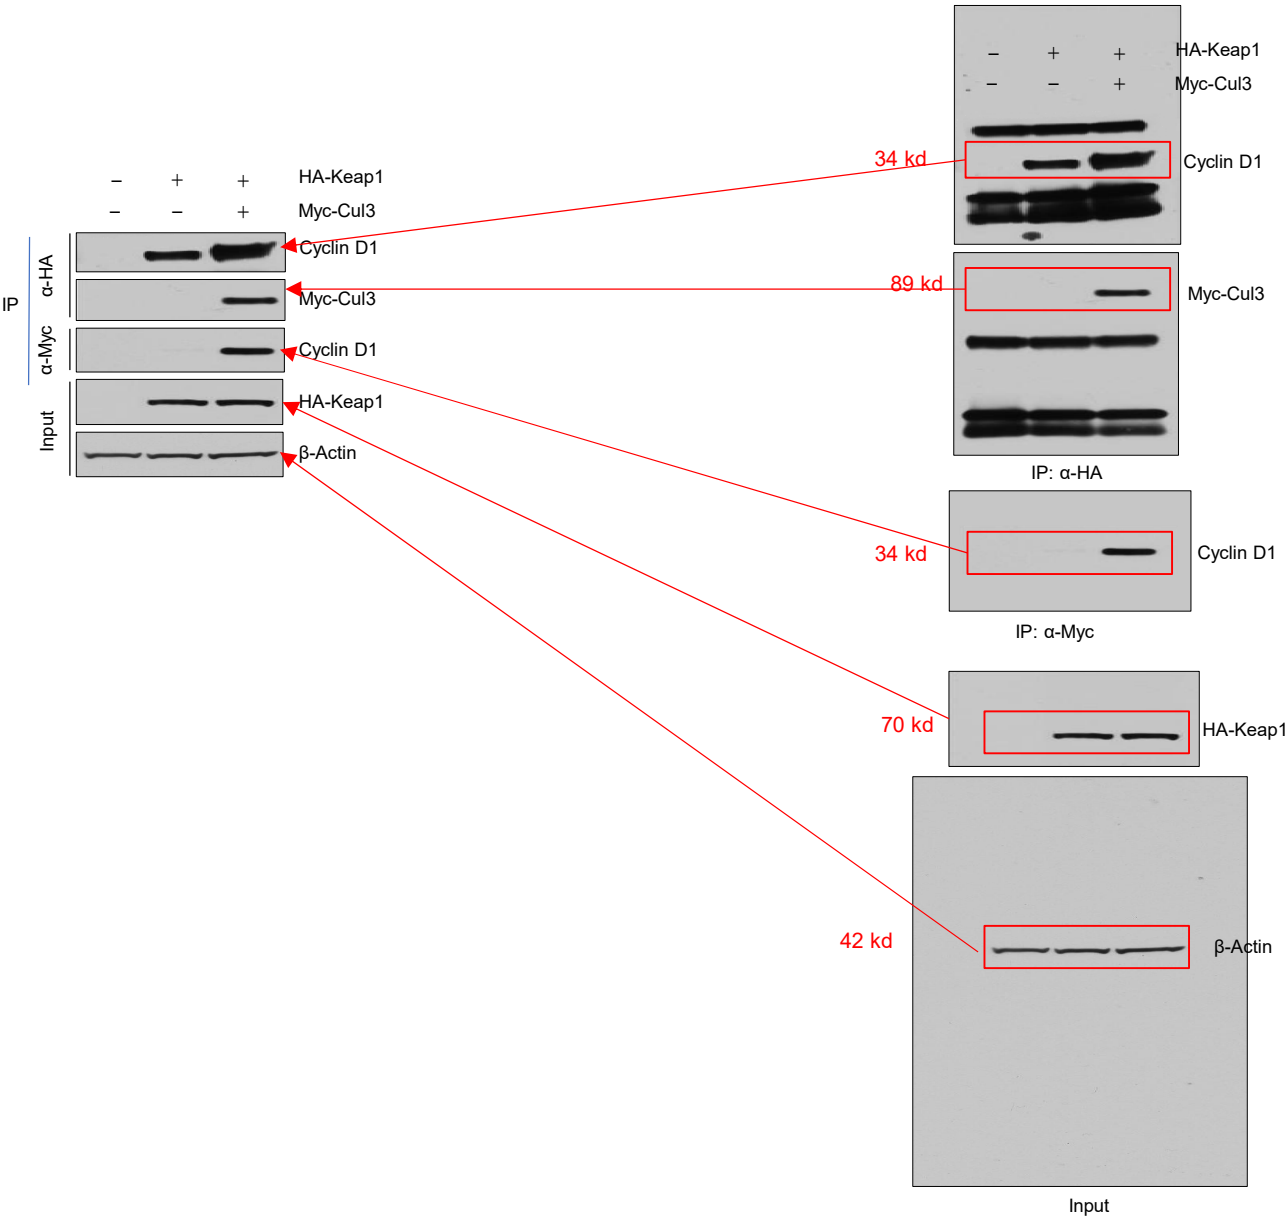

Figure 1B

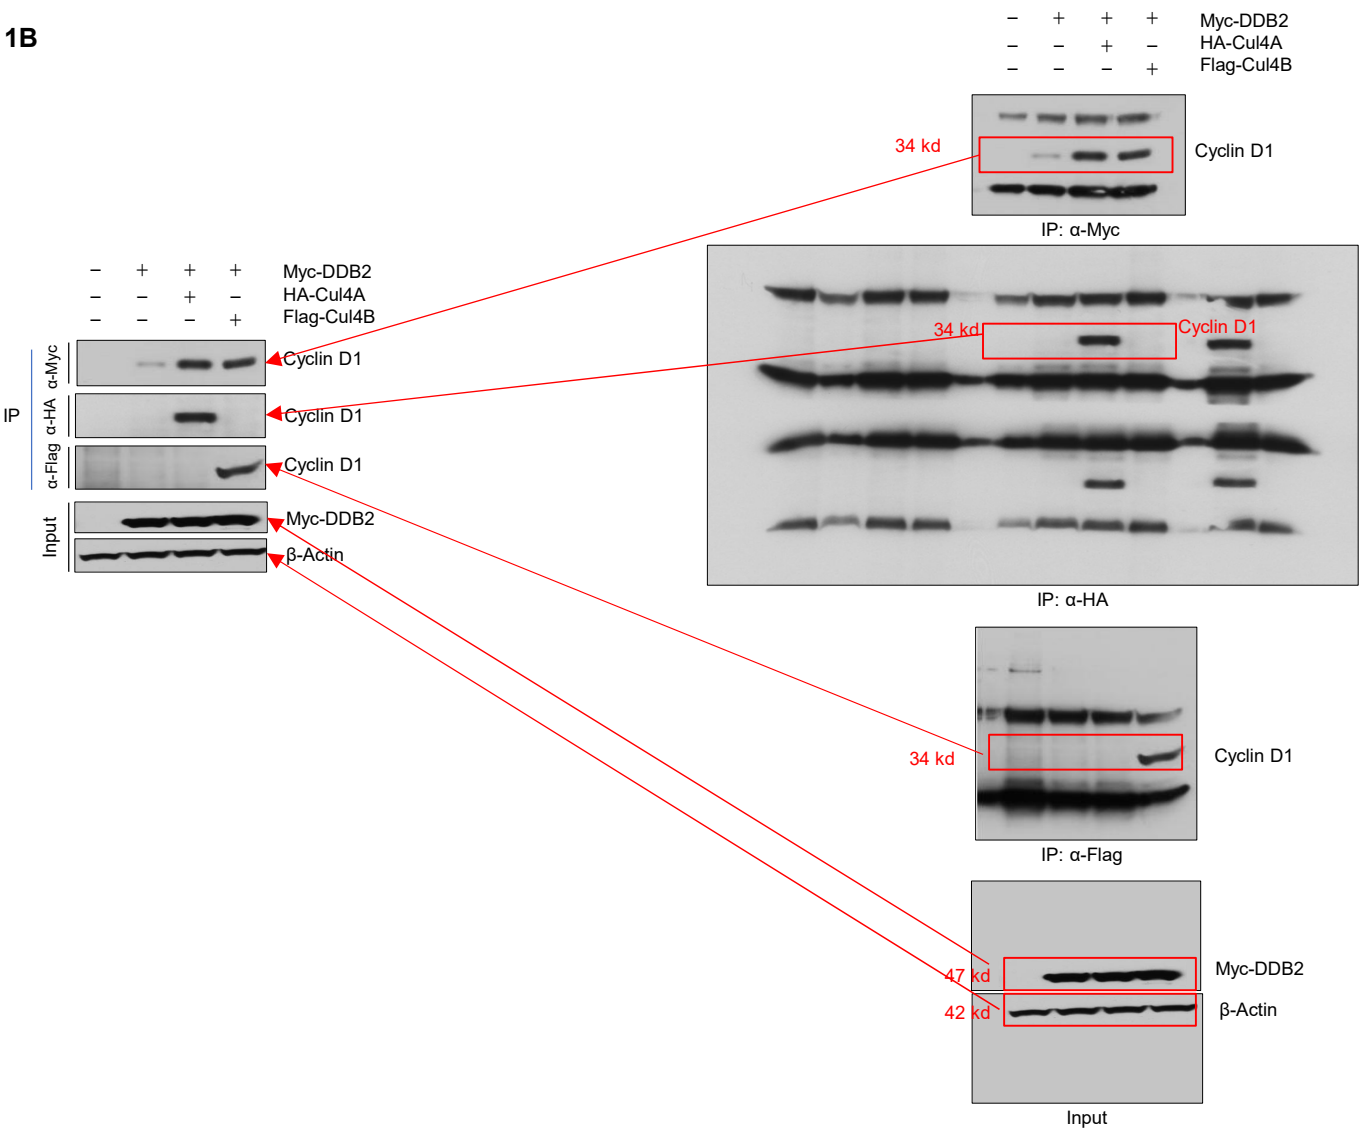

Figure 1C

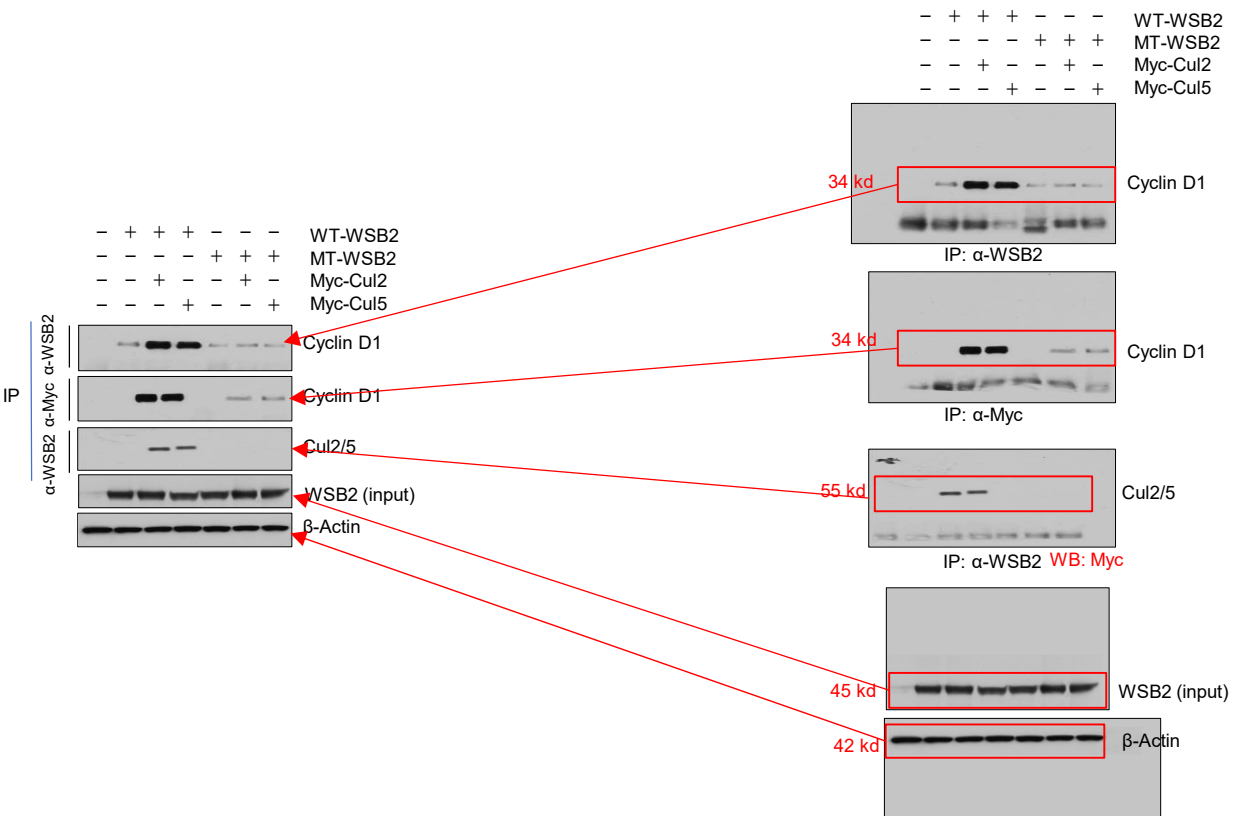

Figure 1D

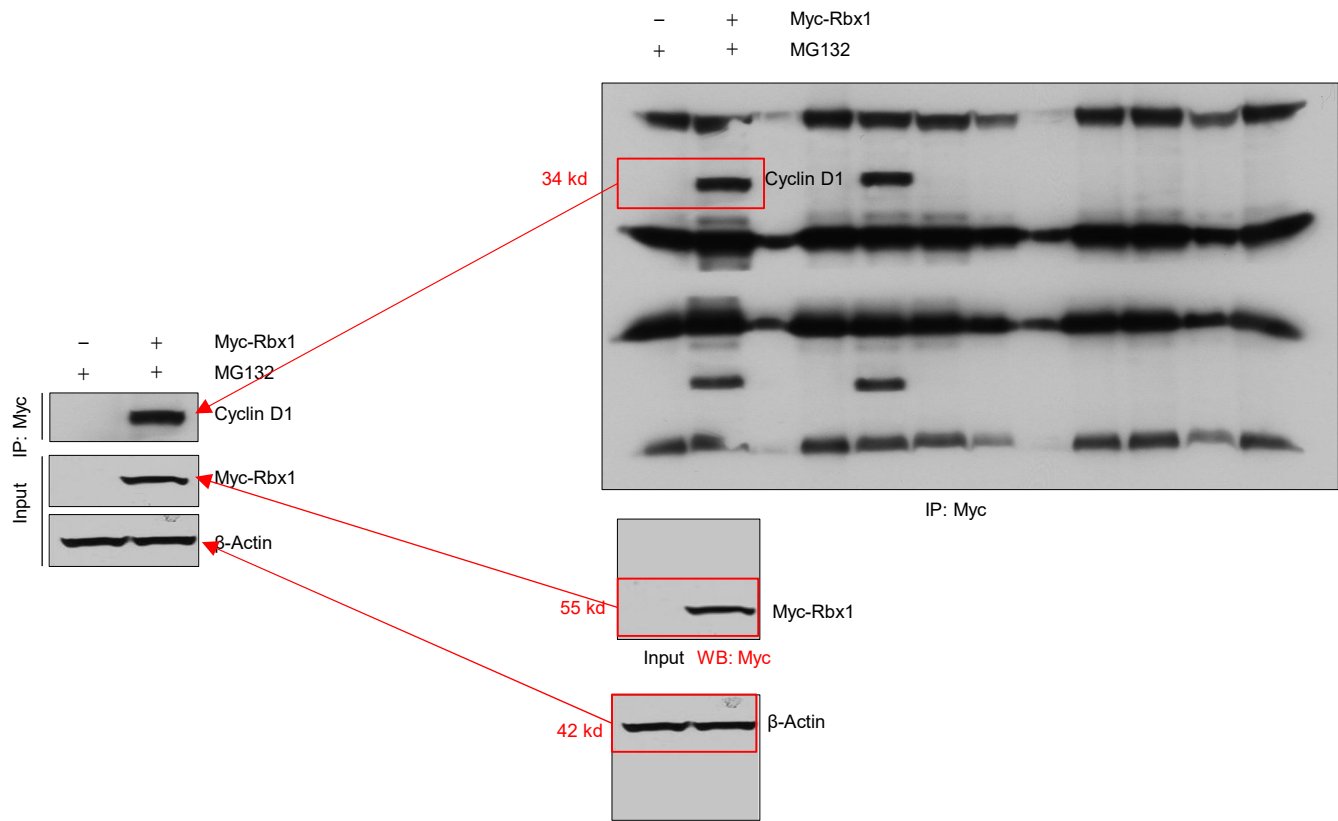

Figure 1E

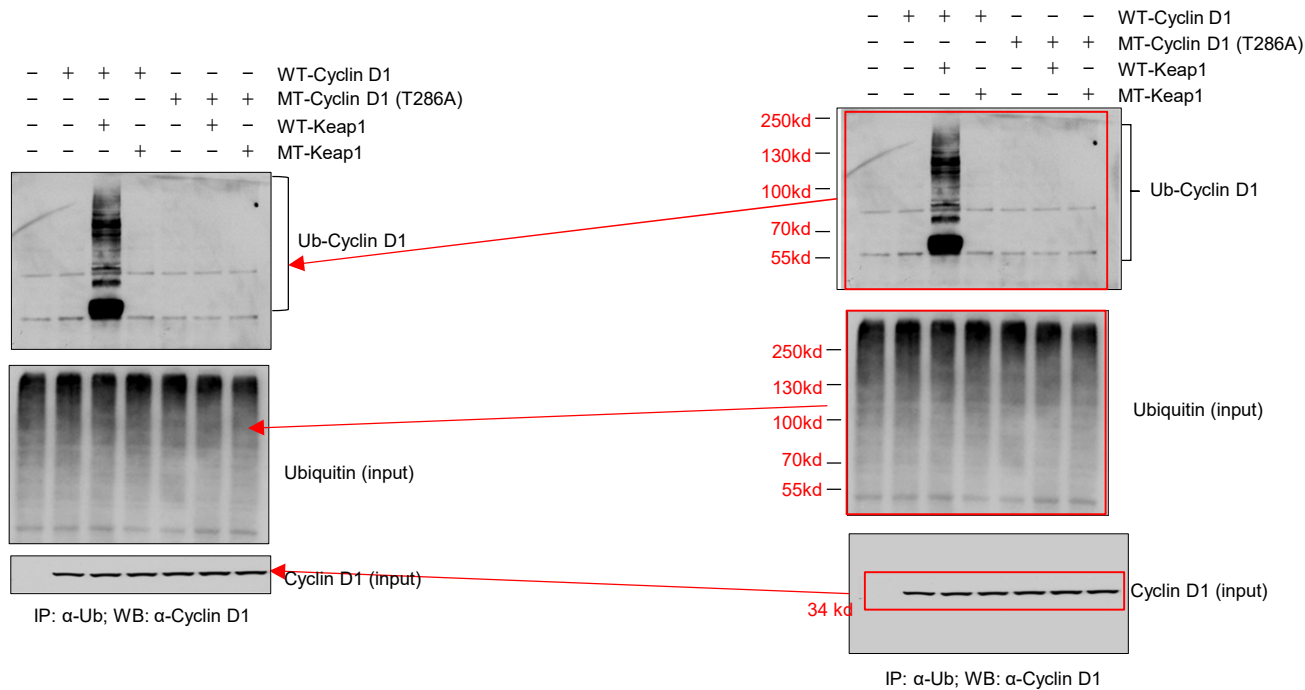

Figure 1F

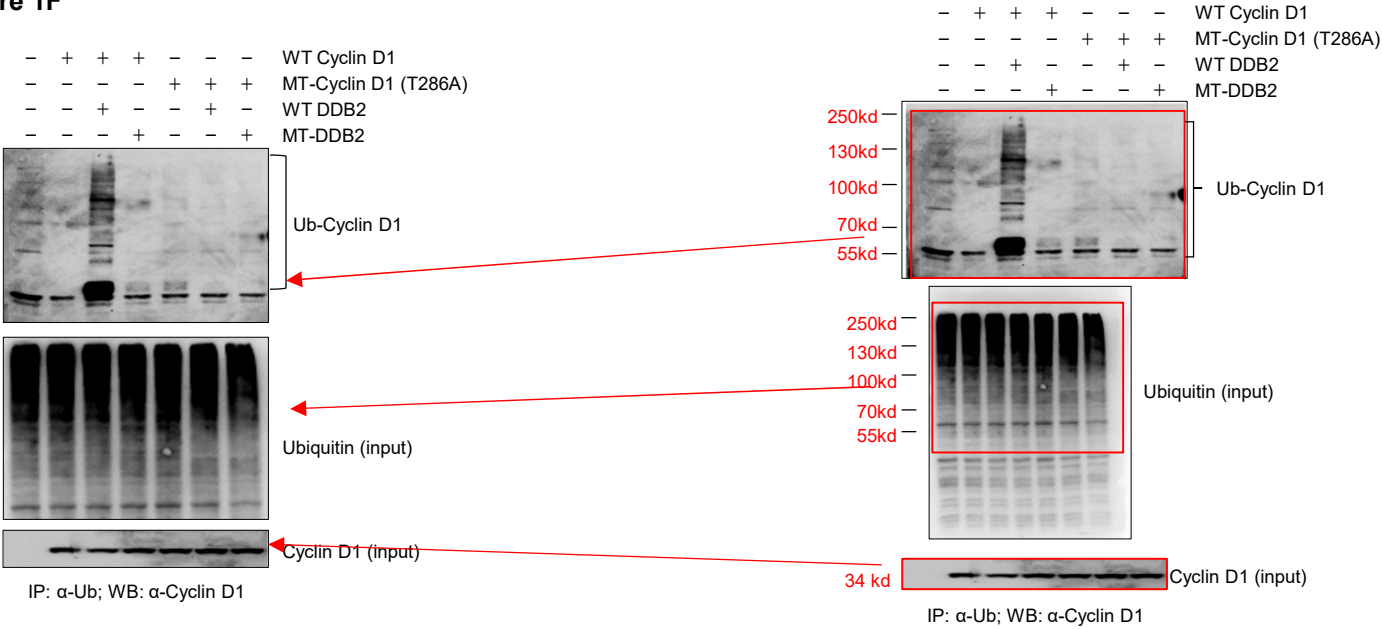

Figure 1G

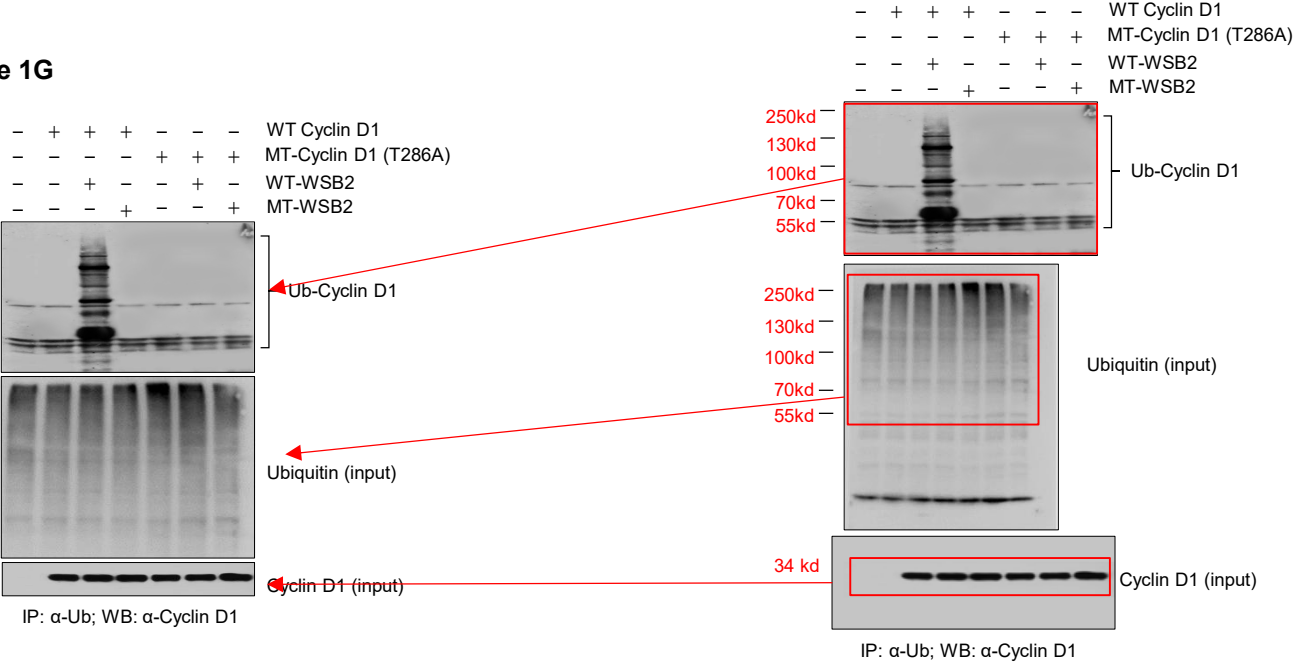

Figure 1H

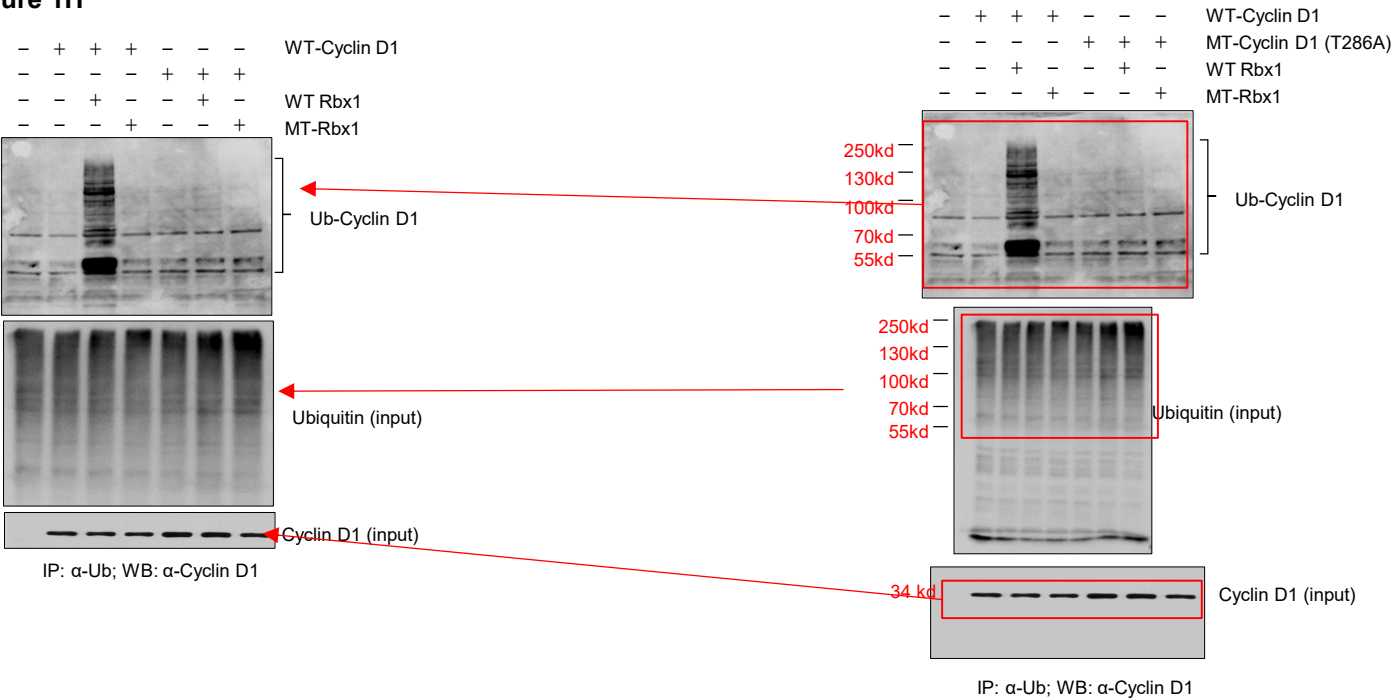

Figure 1I

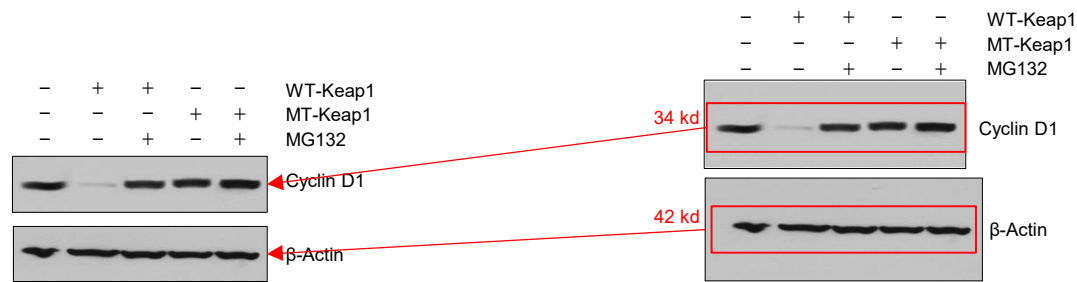

Figure 1J

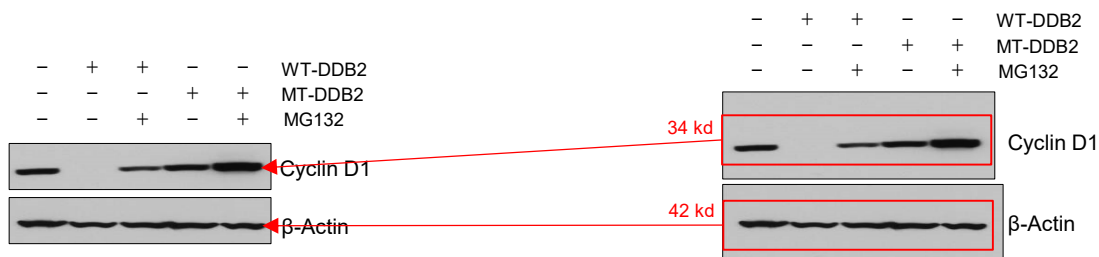

Figure 1K

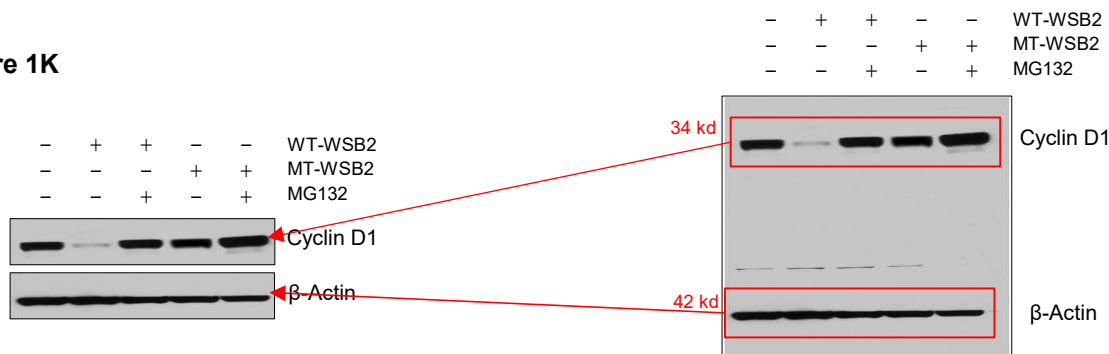

Figure 1L

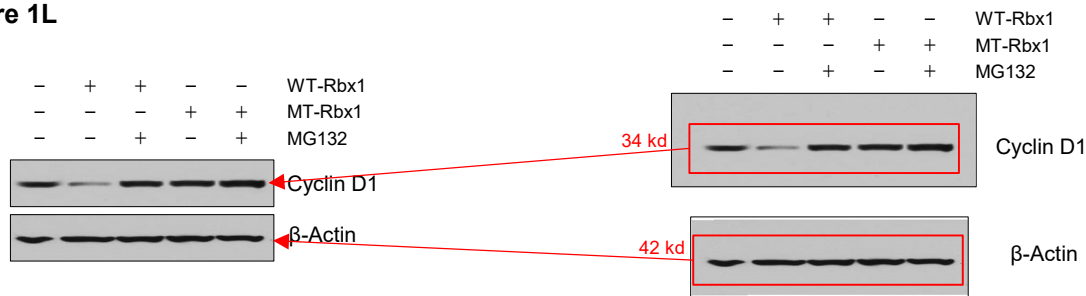

Figure 1M

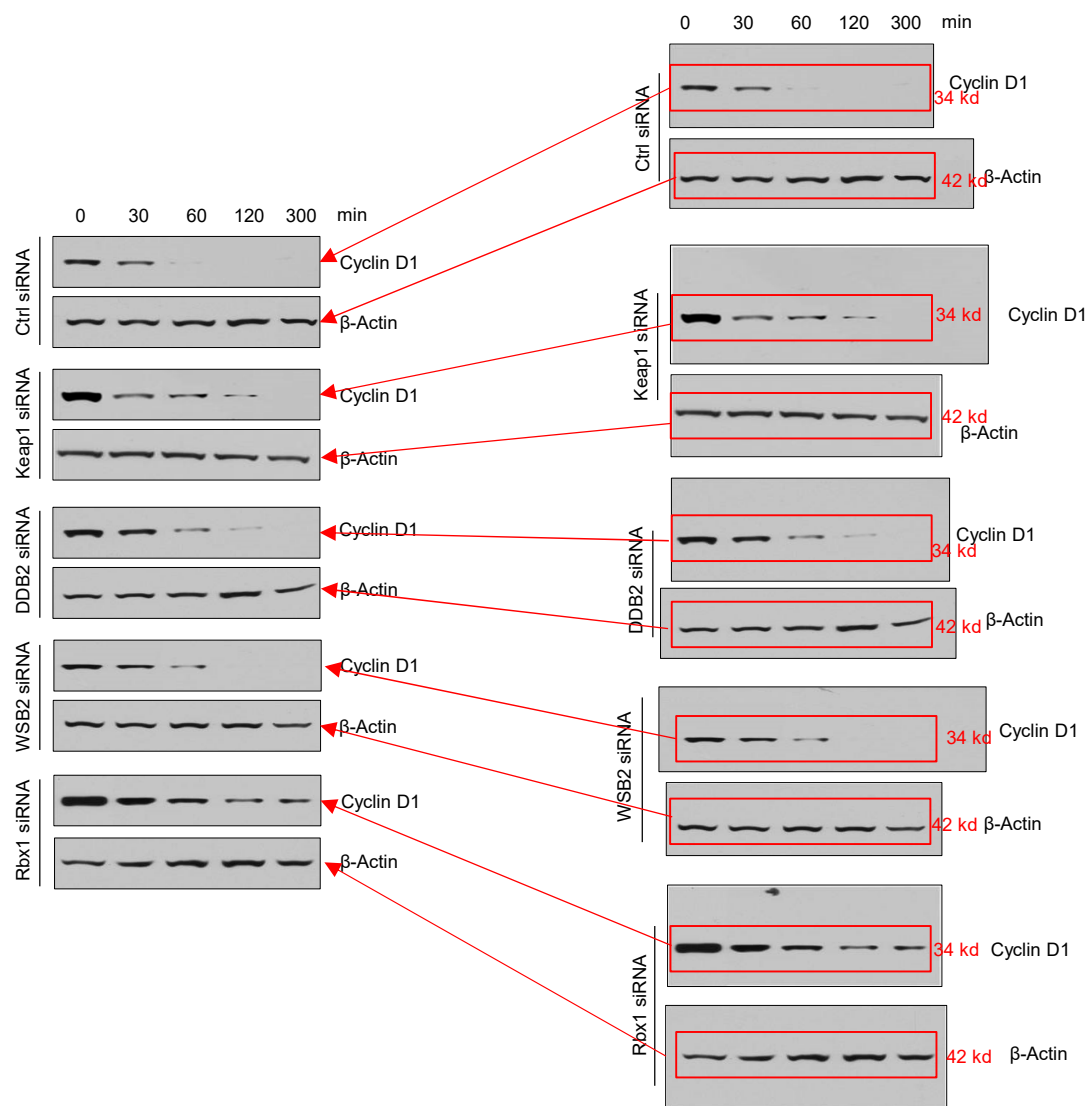

Supplement: supp [file elife-80327-supp-v1.zip]
