# Supplementary material for: Multiple cullin-associated E3 ligases regulate cyclin D1 protein stability
Source: eLife journal article supplement (doi:10.7554/elife.80327), 2023-11-09
Supplement: supp [file elife-80327-supp-v1.zip]

Figure 2-figure supplement 3

|   |   |   |   |   |   |   |   |                   |
|---|---|---|---|---|---|---|---|-------------------|
| + | - | + | - | + | - | + | - | WT Cyclin D1      |
| - | + | - | + | - | + | - | + | Cyclin D1 (K269R) |
| - | - | + | + | - | - | - | - | Keap1             |
| - | - | - | - | + | + | - | - | DDB2              |
| - | - | - | - | - | - | + | + | AMBAR1            |

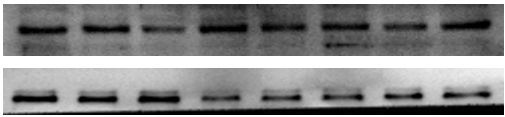

Cyclin D1

β-Actin

|   |   |   |   |   |   |   |   |                   |
|---|---|---|---|---|---|---|---|-------------------|
| + | - | + | - | + | - | + | - | WT Cyclin D1      |
| - | + | - | + | - | + | - | + | Cyclin D1 (K269R) |
| - | - | + | + | - | - | - | - | Keap1             |
| - | - | - | - | + | + | - | - | DDB2              |
| - | - | - | - | - | - | + | + | AMBAR1            |

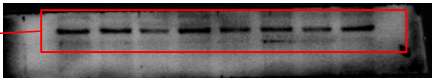

Cyclin D1

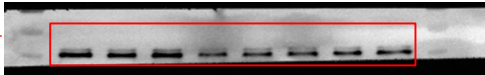

β-Actin

34 kd

42 kd
