# Supplementary material for: Multiple cullin-associated E3 ligases regulate cyclin D1 protein stability
Source: eLife journal article supplement (doi:10.7554/elife.80327), 2023-11-09
Supplement: supp [file elife-80327-supp-v1.zip]

## Sheet: Sheet1
Source Data-Figure 1-figure supplement 10
VVdtc1	Smurf2	Smurf1	Wdr26	Fbxo6b	Fbxo40	Wsb1	Dtl	Fbxl13	Wdr76	Phip	E330017E16	Fbxo7	Wsb2	2210008111Rik	Lmo7	Fbxl2	Fbxo4	VWdr5	Fbxl14	Fbxo5	Fbxw11	Cul7	Fbxo47	72194	Fbxo42	Fbxl10	Fbxo38	Fbxl6	Rbbp5	Fbxl3a	Fbxo27	Fbxl11	lqwd1	Fbxo10	E330009P21Rik	7420402K12Rik	Fbxw5	Fbxl5	Eed	Gm83	Fbxo22	1110064L07Rik	Dda1	Fbxo3	Fbxo2	Cul4a	Ahr	Rbbp4	Fbxo34
0.406918	1.0555	0.497852	1.55195	0.703737	1.32824	0.543537	1.11667	0.672391	1.40901	0.639983	0.619573	1.18192	0.8017	1.10773	0.355821	1.64929	1.26881	1.31605	1.17115	1.43364	1.46823	1.67067	1.02183	0.60852	1.28191	1.44885	0.903541	1.06178	1.12198	1.04525	1.3205	1.55397	0.852827	0.921459	0.812533	1.00562	0.517816	1.05793	1.18155	1.01659	1.28377	1.5593	1.9331	1.47174	1.02829	1.44833	1.45576	1.32821	1.38051
0.452092	0.526155	0.307245	1.3401	0.442611	1.19188	0.925786	1.14672	0.917313	1.32895	1.1296	0.381639	1.15326	0.96212	0.827613	0.533621	1.33298	1.1849	1.39906	1.34206	1.15904	1.29828	1.90428	0.641871	0.769628	0.752185	0.817712	1.04543	0.675657	0.923974	1.06433	1.37615	1.25545	1.23692	0.723228	0.941907	1.28506	1.05245	1.65966	0.889085	0.936913	1.66885	1.73665	1.82497	1.61108	0.941103	2.19821	1.87761	1.51362	1.49727
0.296481	1.00112	0.412777	1.59555	0.405798	1.30519	0.50411	0.767	0.868759	1.38907	1.01774	0.59271	1.35463	1.32754	0.961259	0.650474	1.20146	1.40468	1.53792	1.53223	1.24078	1.42512	1.83173	0.892364	1.17352	0.897359	0.910836	0.65344	0.90752	0.92911	1.04092	1.24729	1.7671	1.12696	1.22019	1.45491	0.813869	1.33168	1.01162	0.764209	0.782999	1.44412	1.60922	1.50171	1.28538	1.65369	1.61959	1.15151	1.67407	1.31743
Tle3	Wdr68	1110004B15Rik	Nup43	Tle2	Gnb2	MGC103250	Mdm2	Fbxo24	Rbx1	Brca1	Fbxo9	Cul3	Fbxo44	Skp2	Fbxl17	Apg161	Rbbp7	0610009C03Rik	Wdr22	4933430F16Rik	Nedd4l	Fbxo8	Ccnf	2610034H20Rik	Fbxo28	Fbxl18	Wdr53	Wdr61	Wdi9	Fbxl7	E330023018	Smu1	Wdr21	Fbxo36	Fbxo17	Hivep3	Vprbp	Fbxl4	Fbxw2	Fbxl12	Nedd4	Fbxw10	Wdr82	Parc	Wwp1	Rnf111	2310058A11Rik	Fbxo15	214931
1.64741	1.02211	1.17856	1.60373	1.29217	1.1591	1.68978	0.96945	1.73473	1.46514	1.24732	1.66339	1.35806	1.23373	1.10012	1.41041	1.43277	1.94547	1.02877	1.67439	1.20034	1.60396	1.05027	1.43116	1.051	1.2022	1.14011	2.01001	1.56071	0.958661	1.08134	1.46976	2.04297	1.23856	1.18261	0.980373	1.29378	1.56628	1.6558	1.32565	1.13119	1.76567	1.46266	1.47559	1.74048	1.5236	1.21449	1.63071	1.33498	1.15069
1.02476	1.37655	1.14932	1.27867	1.17547	1.31049	1.88846	1.16146	1.12694	1.59305	1.8122	1.23898	1.23987	1.22263	1.22818	1.53092	1.88155	1.88741	1.34697	1.42045	1.72642	1.8771	1.36463	1.57912	0.837425	1.19254	1.09498	1.56686	1.27862	0.749283	1.11952	0.991938	1.72865	1.22373	1.38317	1.4822	1.36847	1.17927	1.98851	1.3481	1.75768	1.8186	1.30984	1.28662	1.215	1.202	1.64356	1.58891	1.24798	1.15778
1.15074	1.38228	1.66327	1.41339	1.51798	1.72362	1.30864	1.63878	1.32358	1.31857	1.46307	1.28219	1.39582	1.27661	0.975027	1.65178	1.29478	1.25333	1.27578	1.24092	1.57536	1.50219	0.972861	0.979796	0.923985	1.08263	1.7166	2.06356	0.937586	1.37122	1.54525	1.66156	1.7925	1.21094	1.45562	1.31393	1.15778	1.72711	2.33805	1.87119	1.72887	1.72498	2.07948	2.00303	1.24919	1.60354	1.45456	1.20049	1.76294	1.28581
[truncated: 39 more columns]
