# Supplementary material for: Multiple cullin-associated E3 ligases regulate cyclin D1 protein stability
Source: eLife journal article supplement (doi:10.7554/elife.80327), 2023-11-09
Supplement: supp [file Numerical data obtained during experiments represent in Figure 1-figure supplement 2.xlsx]

## Sheet: Sheet1
Figure 1-figure supplement2-source data 1
Source Data-Figure 1-figure supplement 2
Cul1		Cul2		Cul3		Cul4A		Cul4B		Cul5		Cul7
Ctrl	Cullin siRNA	Ctrl	Cullin siRNA	Ctrl	Cullin siRNA	Ctrl	Cullin siRNA	Ctrl	Cullin siRNA	Ctrl	Cullin siRNA	Ctrl	Cullin siRNA
1	0.383136	1	0.110947	1	0.125047	1	0.373432	1	0.36568	1	0.132426	1	0.371953
