# Supplementary material for: Multiple cullin-associated E3 ligases regulate cyclin D1 protein stability
Source: eLife journal article supplement (doi:10.7554/elife.80327), 2023-11-09
Supplement: supp [file Numerical data obtained during experiments represent in Figure 1-figure supplement 4.xlsx]

## Sheet: Sheet1
Source Data-Figure 1-figure supplement 4
A
	Control	Cul1 siRNA	Cul2 siRNA	Cul3 siRNA	Cul4A siRNA	Cul4B siRNA	Cul5 siRNA	Cul7 siRNA
	1	0.348637	0.659094	0.721324	0.829368	1.48524	1.1515	0.874658
		0.350113	1.26222	1.04227	0.889832	1.25876	1.06694	1.10858
		0.32085	1.12506	1.12118	1.00965	1.03405	1.07017	1.47481
B
	Control	Cul1 siRNA	Cul2 siRNA	Cul3 siRNA	Cul4A siRNA	Cul4B siRNA	Cul5 siRNA	Cul7 siRNA
	1	2.02051	0.281084	0.698146	1.96701	1.57622	1.08302	1.0374
		1.63294	0.406893	0.953628	1.40629	1.37809	0.853707	1.02793
		1.21956	0.511695	0.79431	1.24459	1.24159	1.05334	0.738498
C	Control	Cul1 siRNA	Cul2 siRNA	Cul3 siRNA	Cul4A siRNA	Cul4B siRNA	Cul5 siRNA	Cul7 siRNA
	1	1.04913	0.952448	0.488353	1.15853	0.775545	1.20906	1.52983
		0.807942	0.97408	0.442447	1.05158	0.984512	1.00965	1.2383
		0.702925	1.05173	0.402773	0.952041	0.857075	1.0023	1.09311
D	Control	Cul1 siRNA	Cul2 siRNA	Cul3 siRNA	Cul4A siRNA	Cul4B siRNA	Cul5 siRNA	Cul7 siRNA
	1	1.06159	1.09031	1.4871	0.522219	1.07577	1.39904	1.07754
		1.29956	1.16318	1.17947	0.408858	0.978274	1.30714	0.86475
		1.49886	1.00463	0.919775	0.457612	0.882826	1.19276	0.503149
E	Control	Cul1 siRNA	Cul2 siRNA	Cul3 siRNA	Cul4A siRNA	Cul4B siRNA	Cul5 siRNA	Cul7 siRNA
	1	0.638315	1.08032	0.961954	1.44326	0.429609	0.981205	1.03326
		0.827221	1.1858	0.854194	1.32389	0.343588	0.756512	0.630198
		0.936464	1.09773	0.923908	1.22088	0.283509	0.915432	0.53793
F	Control	Cul1 siRNA	Cul2 siRNA	Cul3 siRNA	Cul4A siRNA	Cul4B siRNA	Cul5 siRNA	Cul7 siRNA
	1	0.68078	0.688375	1.52237	1.152	1.39845	0.509321	0.96023
		1.31889	0.867255	1.30175	0.957198	1.28654	0.453101	0.815867
		1.01331	1.07479	1.1612	0.764645	1.09165	0.341825	0.714705
G	Control	Cul1 siRNA	Cul2 siRNA	Cul3 siRNA	Cul4A siRNA	Cul4B siRNA	Cul5 siRNA	Cul7 siRNA
	1	1.10597	1.20393	1.29613	1.08703	0.857767	1.2949	0.457292
		0.759258	1.08556	1.19303	0.908188	0.98028	1.26996	0.401683
		0.871777	0.89239	1.09185	0.785673	0.914777	1.16811	0.358056
