# Supplementary material for: Multiple cullin-associated E3 ligases regulate cyclin D1 protein stability
Source: eLife journal article supplement (doi:10.7554/elife.80327), 2023-11-09
Supplement: supp [file Numerical data obtained during experiments represent in Figure 1-figure supplement 5.xlsx]

## Sheet: Sheet1
Source Data-Figure 1-figure supplement 5
12h
Ctrl	Cyclin D1	Cyclin D1+Cul1	Cyclin D1+Cul2	Cyclin D1+Cul3	Cyclin D1+Cul4A	Cyclin D1+Cul4B	Cyclin D1+Cul5	Cyclin D1+Cul7
1	4.82282	4.63436	3.77102	2.64469	3.40782	3.31873	3.33726	0.775274
24h
Ctrl	Cyclin D1	Cyclin D1+Cul1	Cyclin D1+Cul2	Cyclin D1+Cul3	Cyclin D1+Cul4A	Cyclin D1+Cul4B	Cyclin D1+Cul5	Cyclin D1+Cul7
1	6.45095	4.06311	3.79605	2.9768	3.22809	3.63657	3.116	0.859983
48h
Ctrl	Cyclin D1	Cyclin D1+Cul1	Cyclin D1+Cul2	Cyclin D1+Cul3	Cyclin D1+Cul4A	Cyclin D1+Cul4B	Cyclin D1+Cul5	Cyclin D1+Cul7
1	5.79031	2.34247	3.20174	2.65906	3.00259	3.6023	2.5907	0.851114
