# Supplementary material for: Multiple cullin-associated E3 ligases regulate cyclin D1 protein stability
Source: eLife journal article supplement (doi:10.7554/elife.80327), 2023-11-09
Supplement: supp [file Numerical data obtained during experiments represent in Figure 1-figure supplement 6.xlsx]

## Sheet: Sheet1
Source Data-Figure 1-figure supplement 6
		Cyclin D1
Control	Cyclin D1	Cul1 siRNA	Cul2 siRNA	Cul3 siRNA	Cul4A siRNA	Cul4B siRNA	Cul5 siRNA	Cul7 siRNA
1.12666	4.86887	7.95907	10.0908	8.15933	9.11603	11.5153	15.3228	9.33733
0.99159	4.57135	7.91849	9.61653	8.19512	8.89288	11.1596	16.5257	8.93966
0.881752	4.84748	7.63964	9.20251	8.47908	8.63285	11.9251	14.9624	8.48733
