# Supplementary material for: Multiple cullin-associated E3 ligases regulate cyclin D1 protein stability
Source: eLife journal article supplement (doi:10.7554/elife.80327), 2023-11-09
Supplement: supp [file Numerical data obtained during experiments represent in Figure 1-figure supplement 9.xlsx]

## Sheet: Sheet1
Source Data-Figure 1-figure supplement 9
Ctrl	CUL1	CUL2	CUL3	CUL4A	CUL4B	CUL5	CUL7
1	1.13081	0.82957	1.09681	1.06166	1.03307	0.927051	0.85964
	1.25477	1.03414	0.945162	0.883725	1.22043	0.823225	1.04498
	0.865167	0.614372	1.09823	0.778662	0.913713	1.16772	1.19763
