# Supplementary material for: Multiple cullin-associated E3 ligases regulate cyclin D1 protein stability
Source: eLife journal article supplement (doi:10.7554/elife.80327), 2023-11-09
Supplement: supp [file Numerical data obtained during experiments represent in Figure 1-figure supplement 12.xlsx]

## Sheet: Sheet1
Source Data-Figure 1-figure supplement 12
Keap1			KLHL12			DDB2			DDB1
Ctrl	Keap siRNA		Ctrl	Keap siRNA		Ctrl	DDB2 siRNA		Ctrl	DDB2 siRNA
1.05235	0.25069		1.01613	1.0427		0.892222	0.263045		0.982658	0.966108
1.03786	0.327878		0.948559	1.16313		1.01691	0.417567		0.973071	1.15939
0.909793	0.399793		1.03531	0.902098		1.09087	0.348176		1.04427	0.767731
WSB2			WSB1			Rbx1			ROC2
Ctrl	WSB2 siRNA		Ctrl	WSB2 siRNA		Ctrl	Rbx1 siRNA		Ctrl	Rbx1 siRNA
1.01948	0.512029		0.992757	1.07141		0.91733	0.186276		0.927253	1.30817
1.10302	0.272934		0.972327	1.05666		0.968853	0.206686		0.973353	1.06092
0.877494	0.398568		1.03492	1.48402		1.11382	0.39114		1.09939	1.04513
