# Supplementary material for: Multiple cullin-associated E3 ligases regulate cyclin D1 protein stability
Source: eLife journal article supplement (doi:10.7554/elife.80327), 2023-11-09
Supplement: supp [file Numerical data obtained during experiments represent in Figure 1.xlsx]

## Sheet: Sheet1
Source Data-Figure 1N
quantification of the CHX assays
Min	Ctrl siRNA			Keap1 siRNA			DDB2 siRNA			WSB2 siRNA			Rbx1 siRNA
0	1.07151	1.0096	0.918893	0.88293	0.94298	1.17409	0.990542	0.98718	1.02228	0.88386	0.911026	1.20511	1.00178	0.983981	1.01423
30	0.641285	0.604181	0.541216	0.332425	0.55034	0.571731	0.674254	0.667011	0.692139	0.6068	0.628145	0.835856	0.613911	0.596644	0.609794
60	0.059358	0.058741	0.041214	0.319118	0.339532	0.349092	0.225478	0.21836	0.22342	0.240897	0.25327	0.321733	0.289492	0.283018	0.285553
120	0.023065	0.017543	0.013365	0.151195	0.166202	0.15526	0.060972	0.054283	0.051804	0.020888	0.025894	0.021126	0.146777	0.143504	0.141907
300	0.039291	0.035781	0.025612	0.035618	0.040364	0.028396	0.067383	0.055267	0.045433	0.022614	0.030702	0.025146	0.217764	0.215755	0.211904
