# Supplementary figures and images for: Multiple cullin-associated E3 ligases regulate cyclin D1 protein stability
Source: eLife journal article supplement (doi:10.7554/elife.80327), 2023-11-09

Figure 1-figure supplement 8

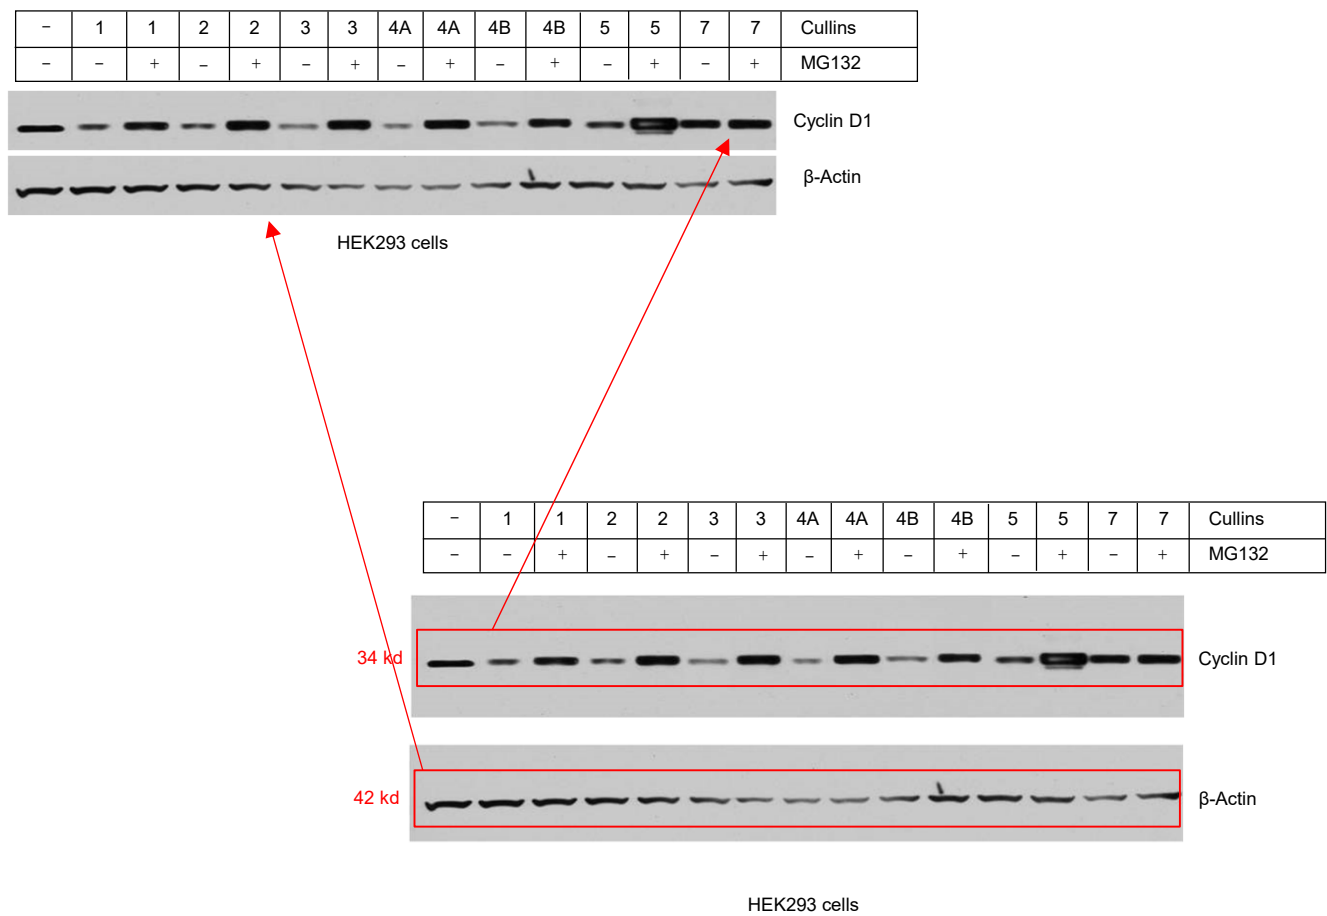

Supplement: supp [file elife-80327-supp-v1.zip]

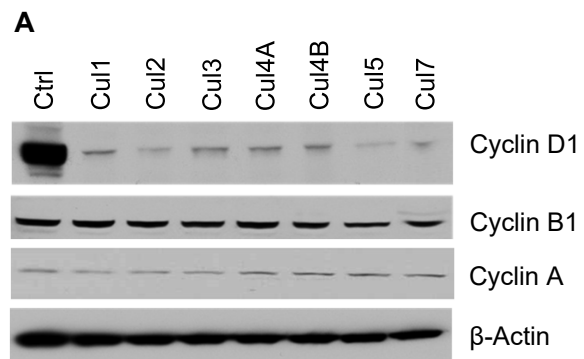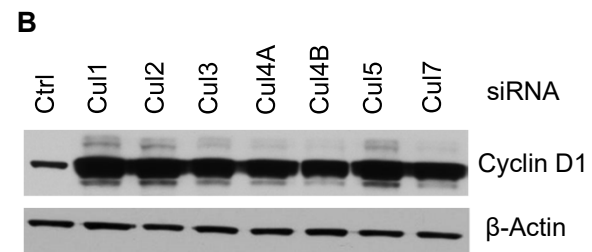

Supplement: supp [file elife-80327-supp-v1.zip]

Figure 1-figure supplement 3

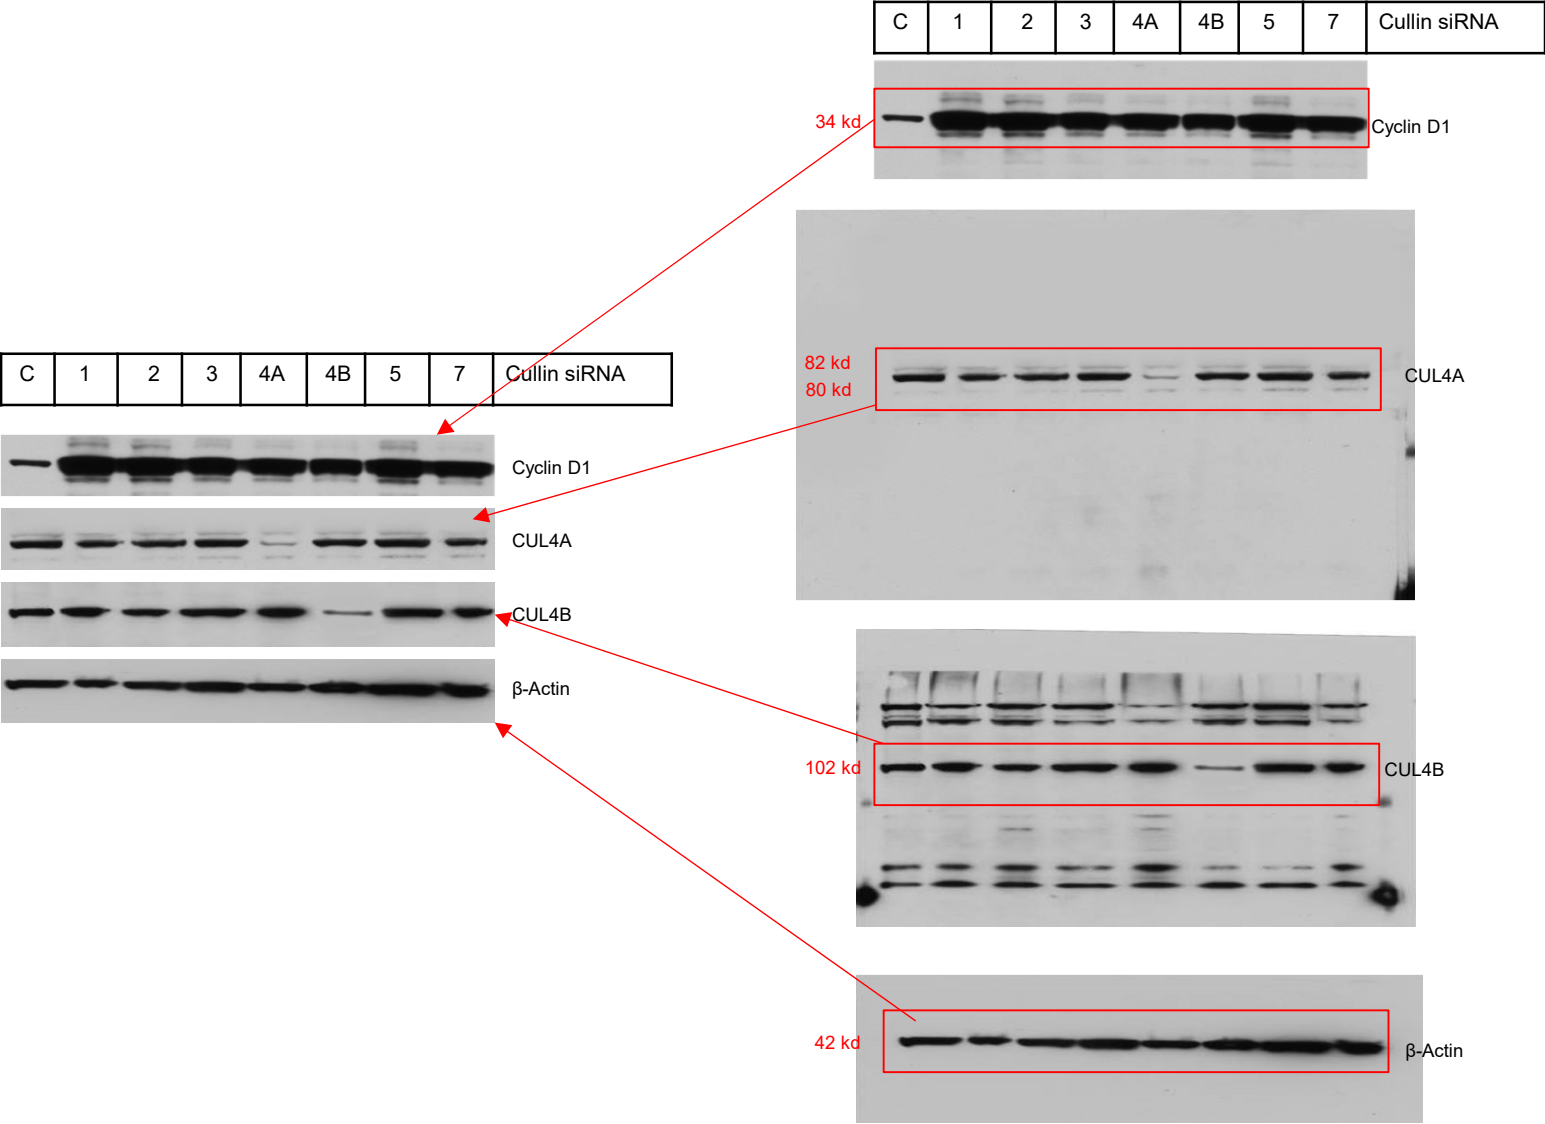

Supplement: supp [file elife-80327-supp-v1.zip]

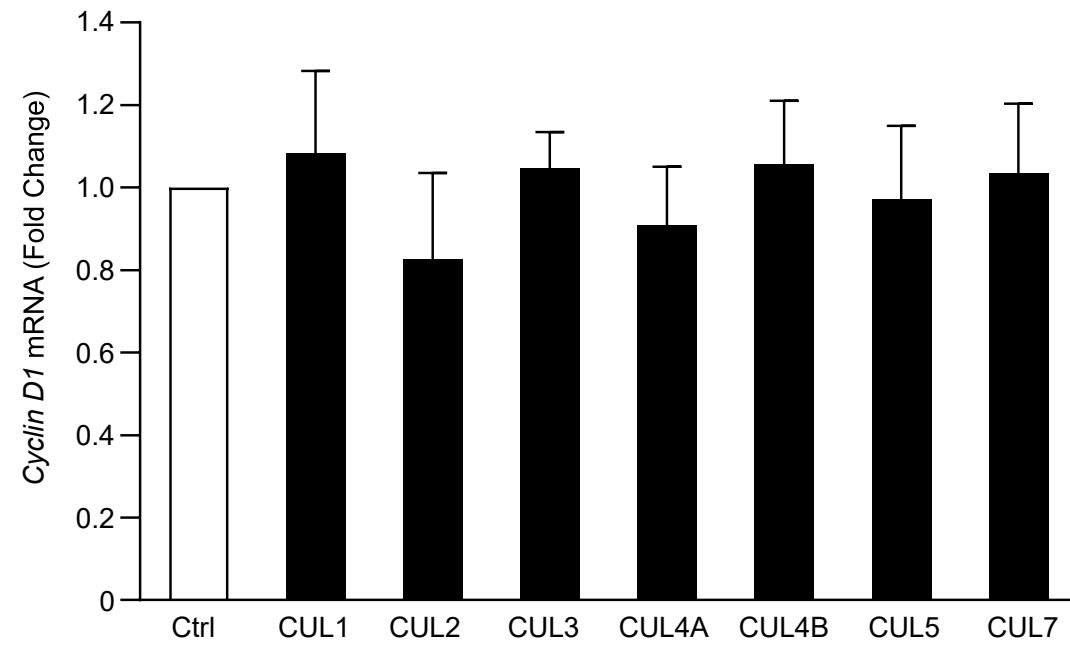

Supplement: supp [file elife-80327-supp-v1.zip]

|   |   |   |   |   |   |   |   |    |    |    |    |   |   |   |   |                    |
|---|---|---|---|---|---|---|---|----|----|----|----|---|---|---|---|--------------------|
| + | - | + | - | + | - | + | - | +  | -  | +  | -  | + | - | + | - | Cyclin D1          |
| - | + | - | + | - | + | - | + | -  | +  | -  | +  | - | + | - | + | mCyclin D1 (T286A) |
| - | - | 1 | 1 | 2 | 2 | 3 | 3 | 4A | 4A | 4B | 4B | 5 | 5 | 7 | 7 | Cullins            |

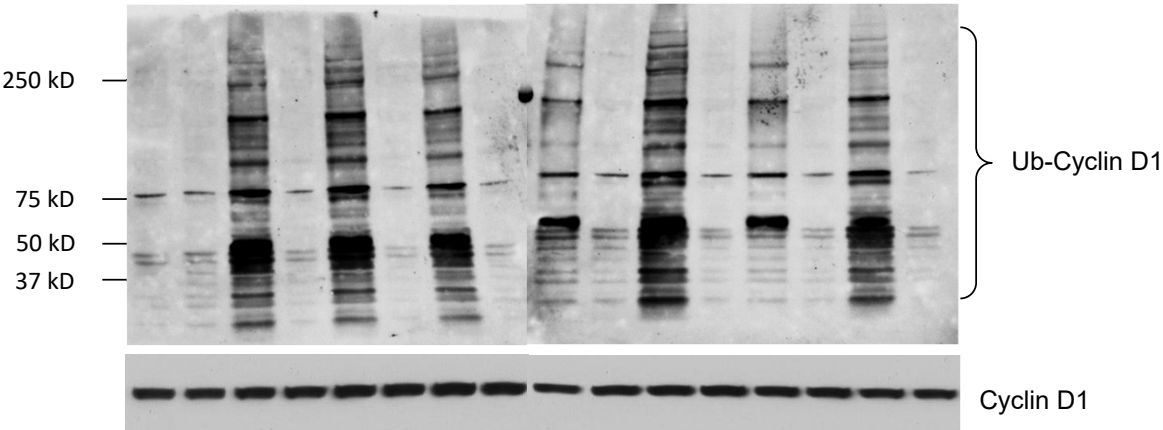

IP:  $\alpha$ -Ubiquitin; WB:  $\alpha$ -Cyclin D1

Supplement: supp [file elife-80327-supp-v1.zip]

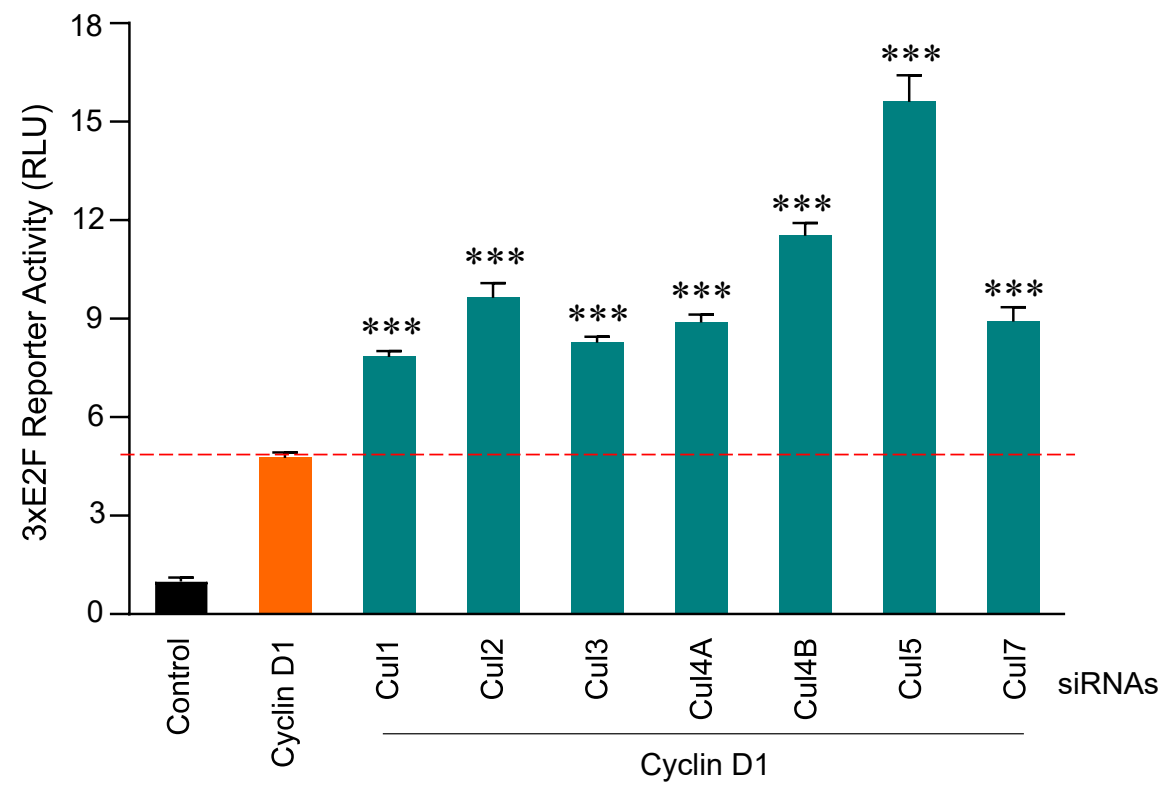

Supplement: supp [file elife-80327-supp-v1.zip]

**A**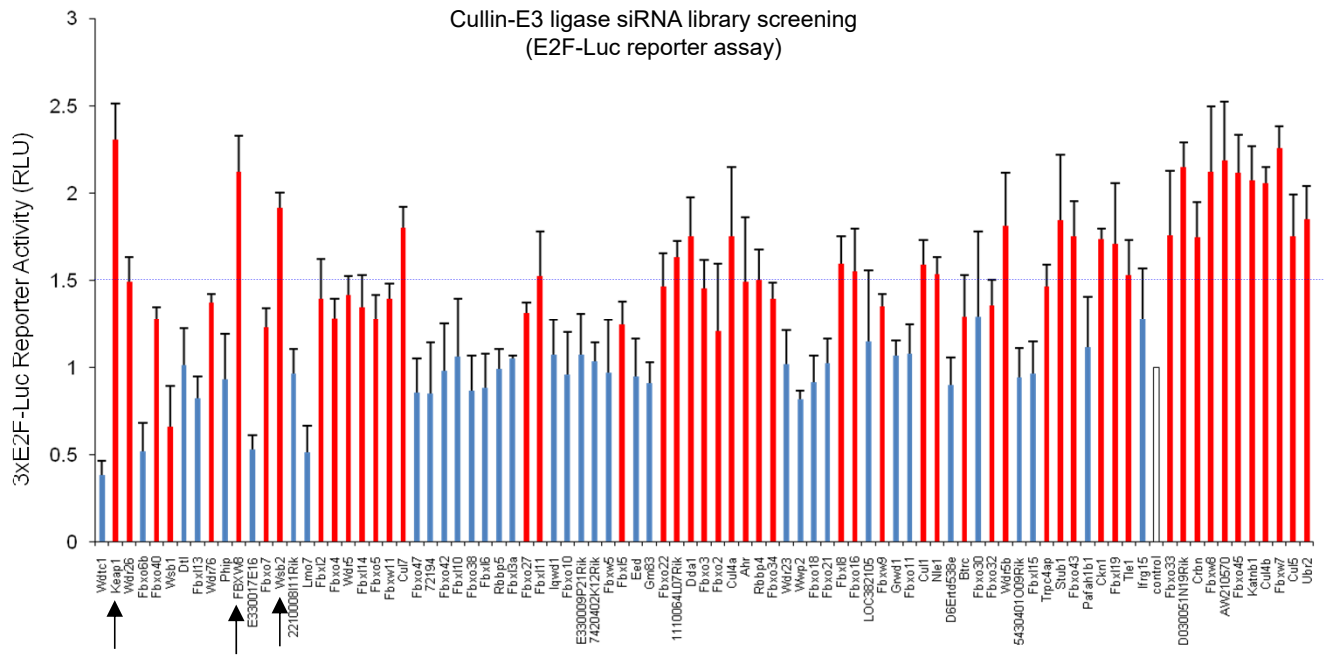**B**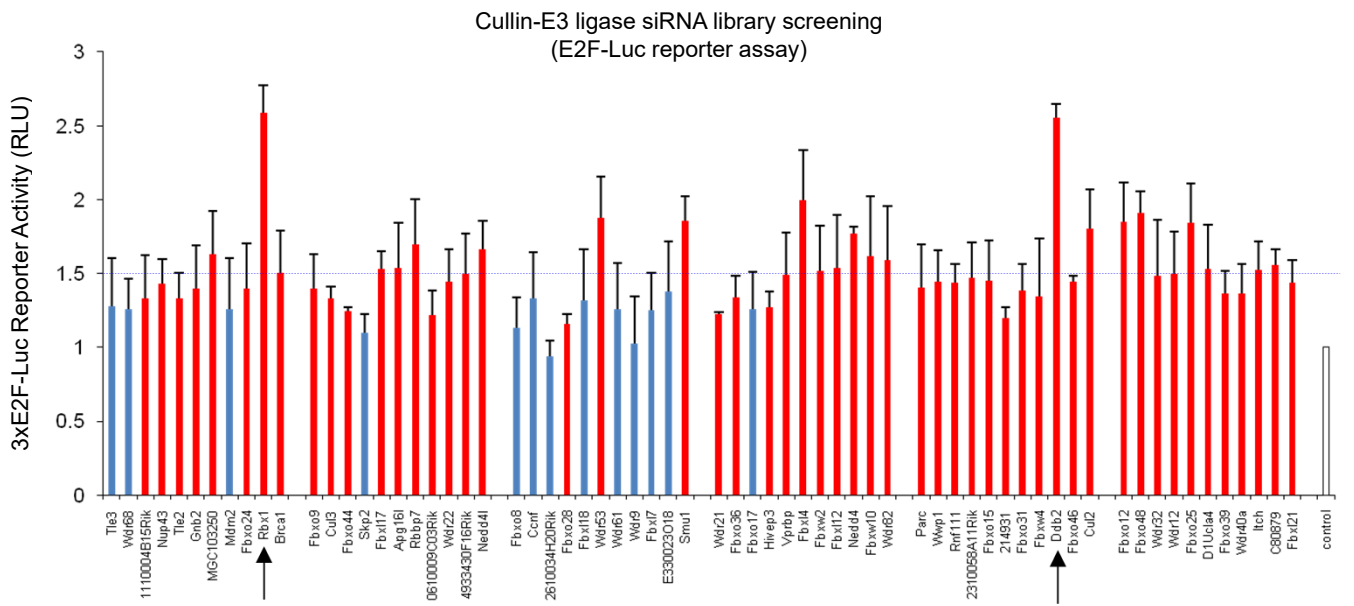

Supplement: supp [file elife-80327-supp-v1.zip]

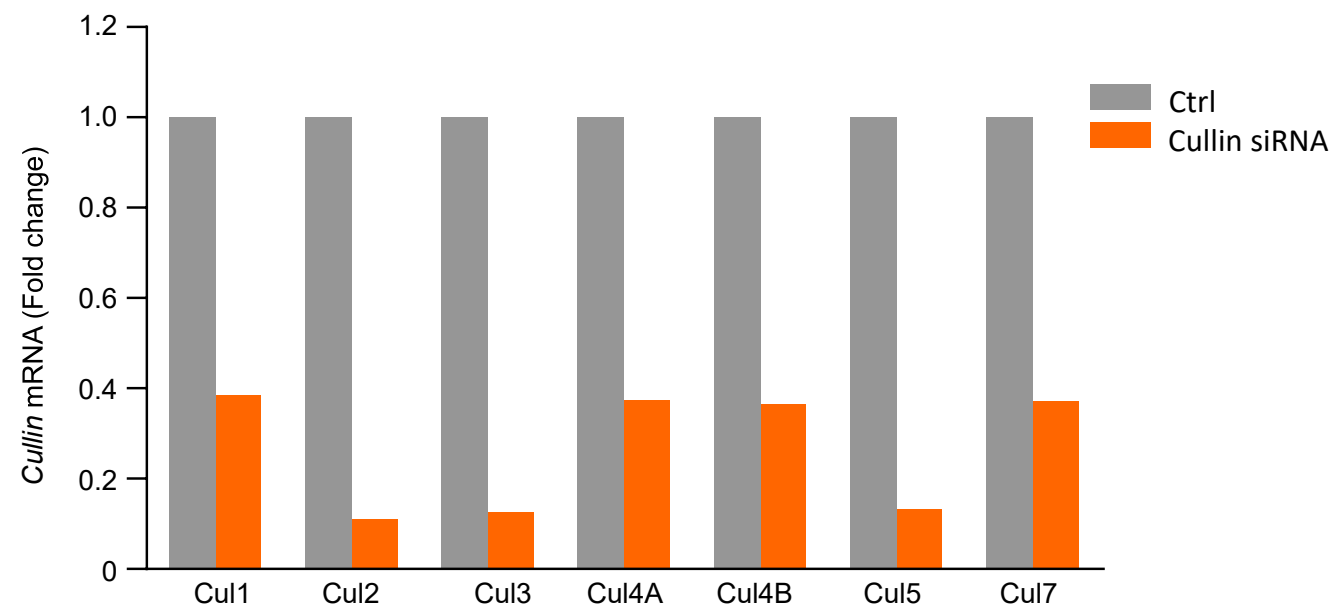

Supplement: supp [file elife-80327-supp-v1.zip]

Figure 1-figure supplement 11

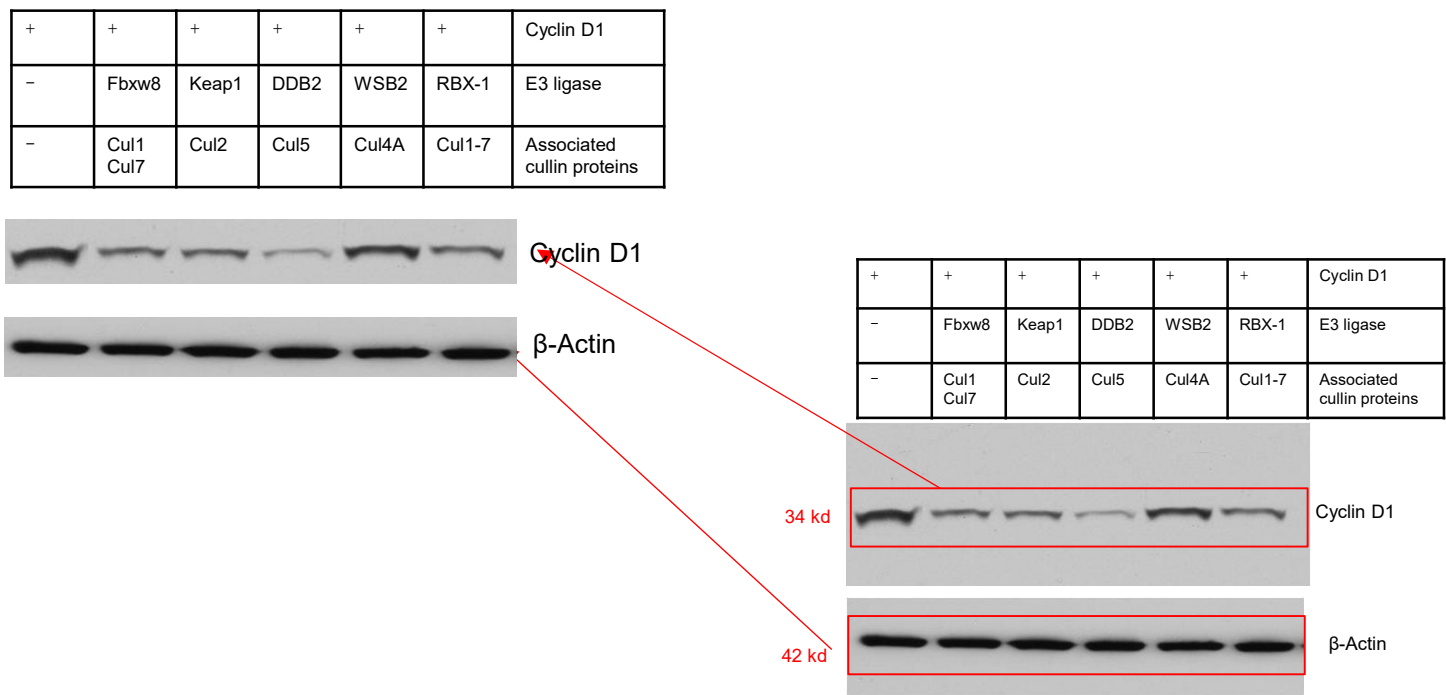

Supplement: supp [file elife-80327-supp-v1.zip]

|   |   |   |   |   |   |   |   |   |   |                   |
|---|---|---|---|---|---|---|---|---|---|-------------------|
| + | + | + | + | + | - | - | - | - | - | WT Cyclin D1      |
| - | - | - | - | - | + | + | + | + | + | Cyclin D1 (T286A) |
| - | + | - | - | - | - | + | - | - | - | Keap1             |
| - | - | + | - | - | - | - | + | - | - | WSB2              |
| - | - | - | + | - | - | - | - | + | - | DDB2              |
| - | - | - | - | + | - | - | - | - | + | RBX1              |

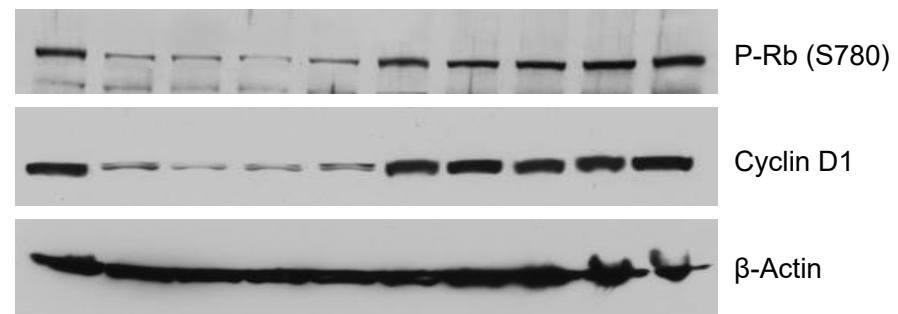

Supplement: supp [file elife-80327-supp-v1.zip]

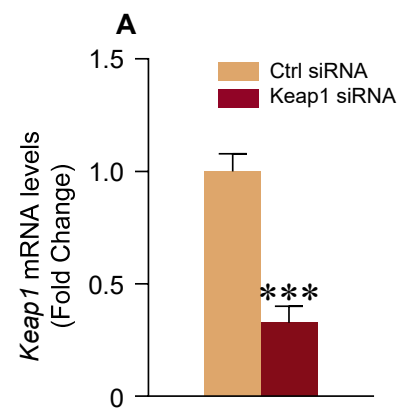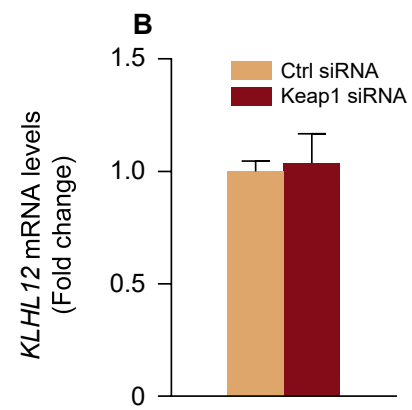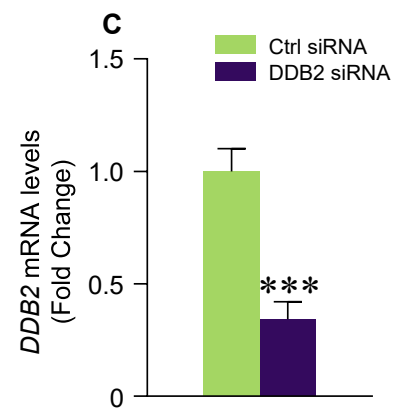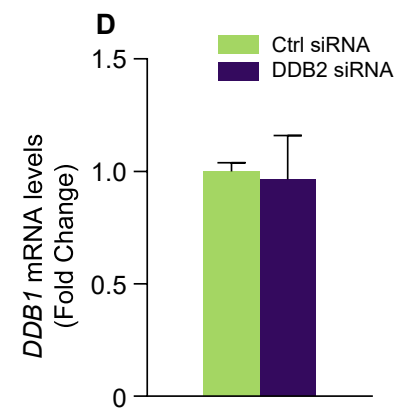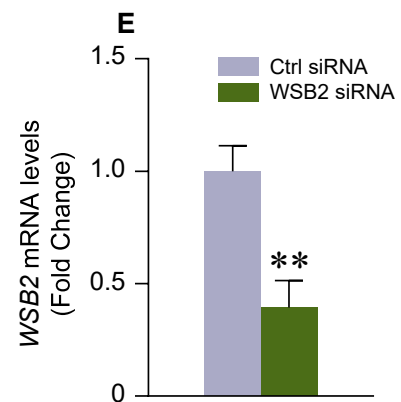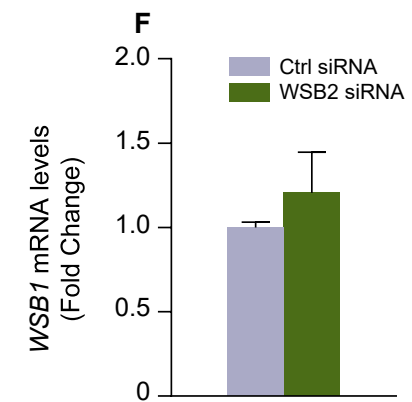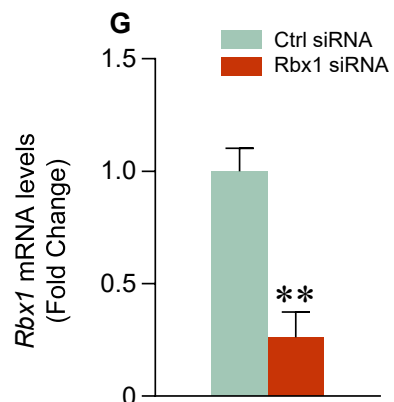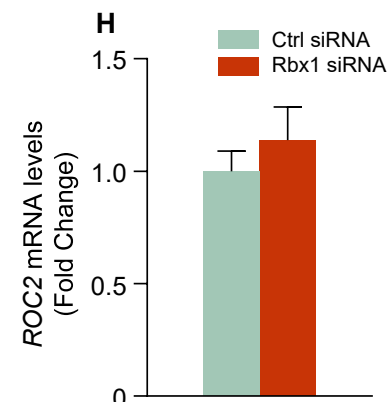

Supplement: supp [file elife-80327-supp-v1.zip]

Figure 2-figure supplement 4

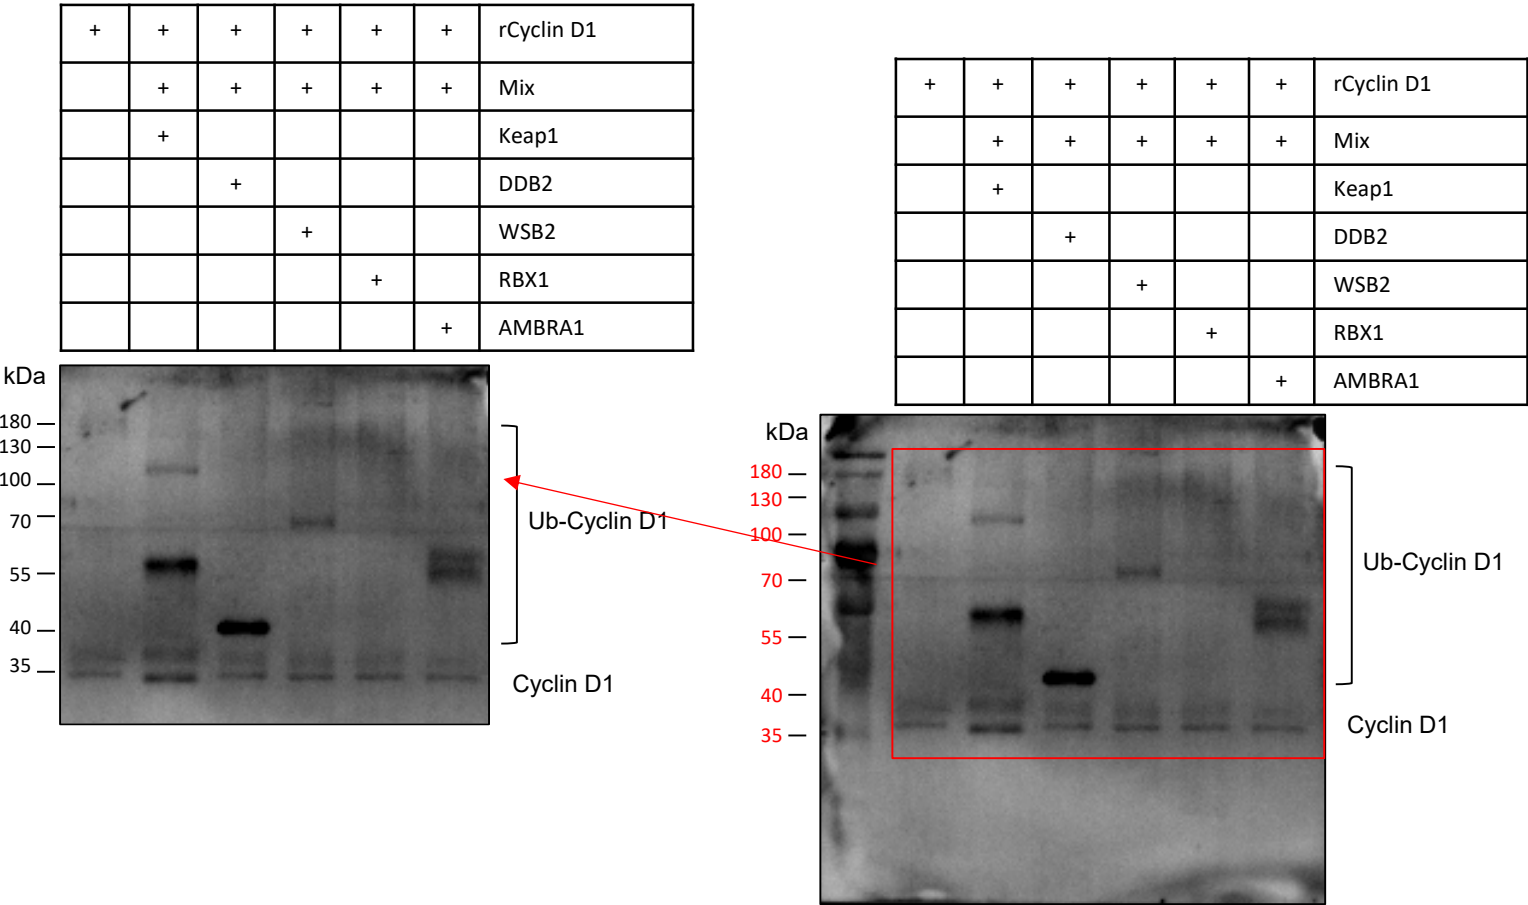

Supplement: supp [file elife-80327-supp-v1.zip]

|   |   |   |   |   |   |           |
|---|---|---|---|---|---|-----------|
| + | + | + | + | + | + | Cyclin D1 |
|   | + | + | + | + | + | Mix       |
|   | + |   |   |   |   | Keap1     |
|   |   | + |   |   |   | DDB2      |
|   |   |   | + |   |   | WSB2      |
|   |   |   |   | + |   | RBX1      |
|   |   |   |   |   | + | AMBRA1    |

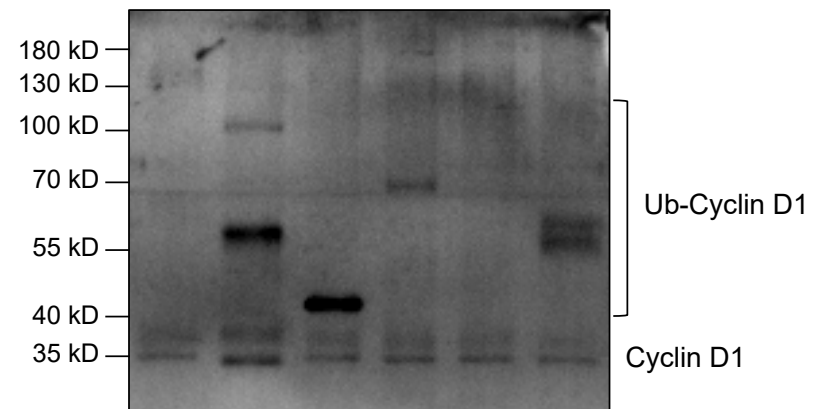

Supplement: supp [file elife-80327-supp-v1.zip]

|   |              |       |      |       |        |                               |
|---|--------------|-------|------|-------|--------|-------------------------------|
| + | +            | +     | +    | +     | +      | Cyclin D1                     |
| - | Fbxw8        | Keap1 | DDB2 | WSB2  | RBX-1  | E3 ligase                     |
| - | Cul1<br>Cul7 | Cul2  | Cul5 | Cul4A | Cul1-7 | Associated<br>cullin proteins |

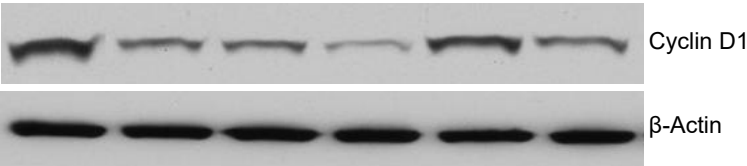

Supplement: supp [file elife-80327-supp-v1.zip]

|   |   |   |   |   |   |   |   |                   |
|---|---|---|---|---|---|---|---|-------------------|
| + | - | + | - | + | - | + | - | WT Cyclin D1      |
| - | + | - | + | - | + | - | + | Cyclin D1 (K269R) |
| - | - | + | + | - | - | - | - | Keap1             |
| - | - | - | - | + | + | - | - | DDB2              |
| - | - | - | - | - | - | + | + | AMBAR1            |

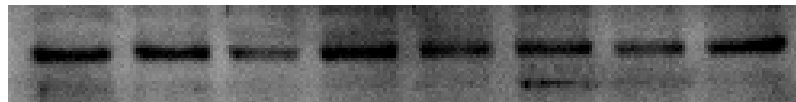

Cyclin D1

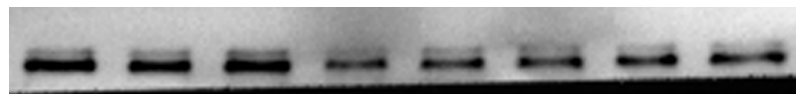

β-Actin

Supplement: supp [file elife-80327-supp-v1.zip]

Figure 2A

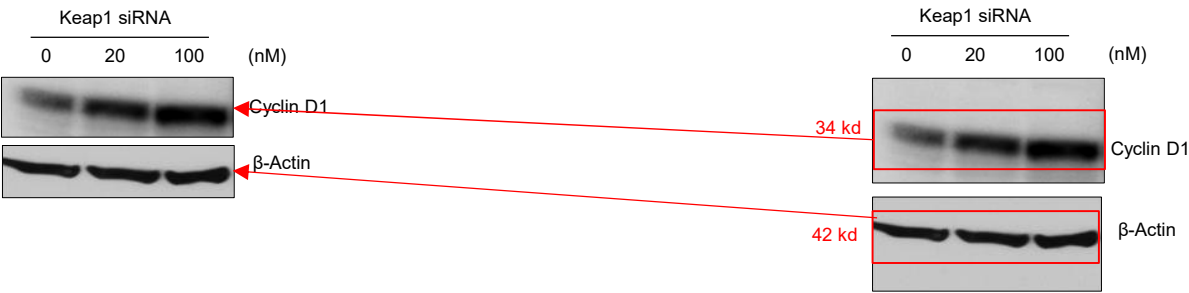

Figure 2D

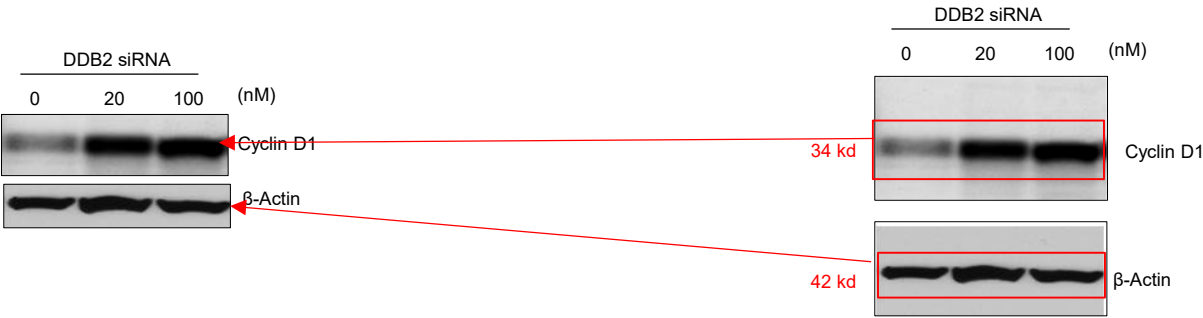

Figure 2G

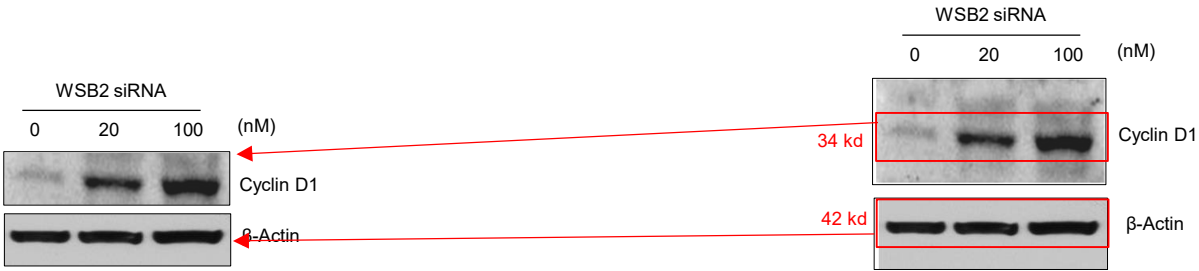

Figure 2J

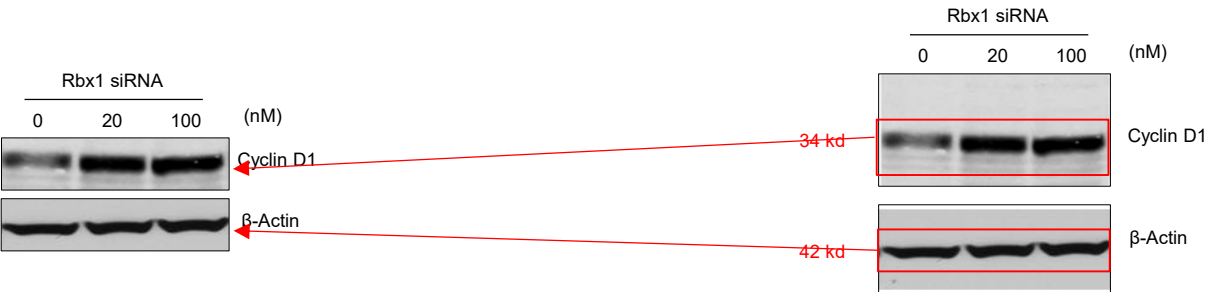

Supplement: supp [file elife-80327-supp-v1.zip]

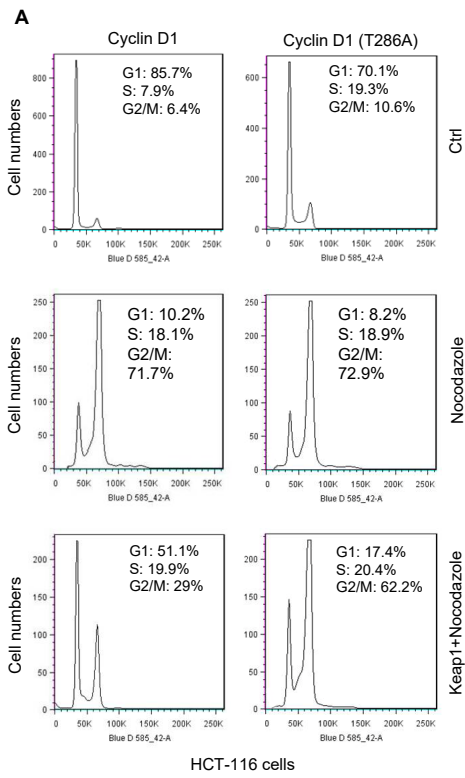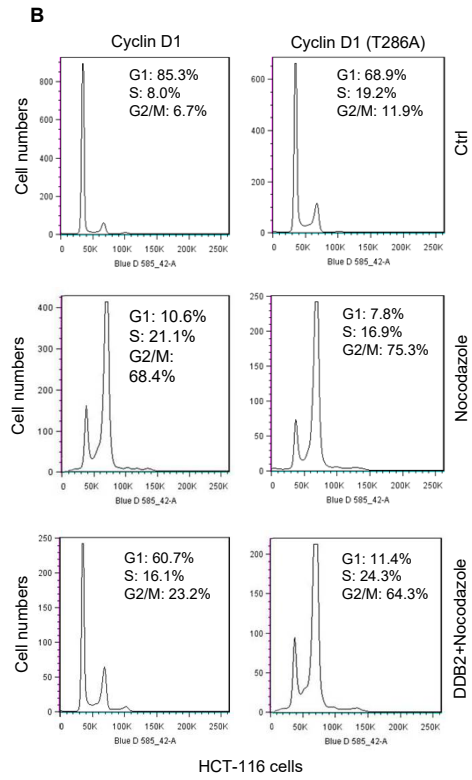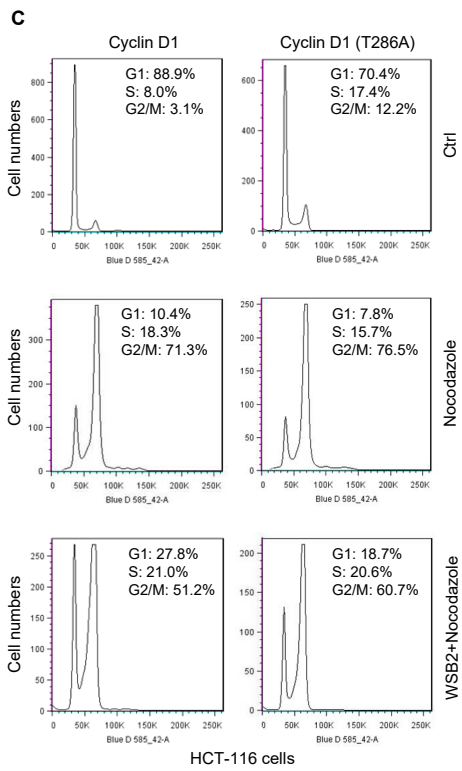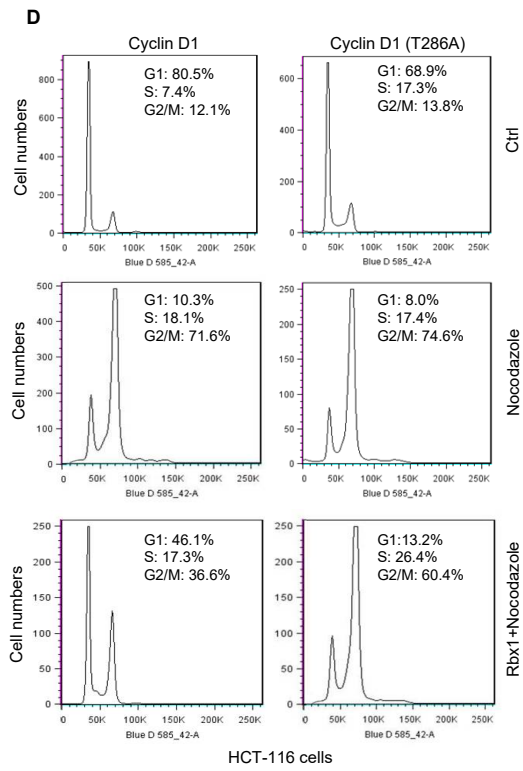

Supplement: supp [file elife-80327-supp-v1.zip]

Figure 1-figure supplement 7

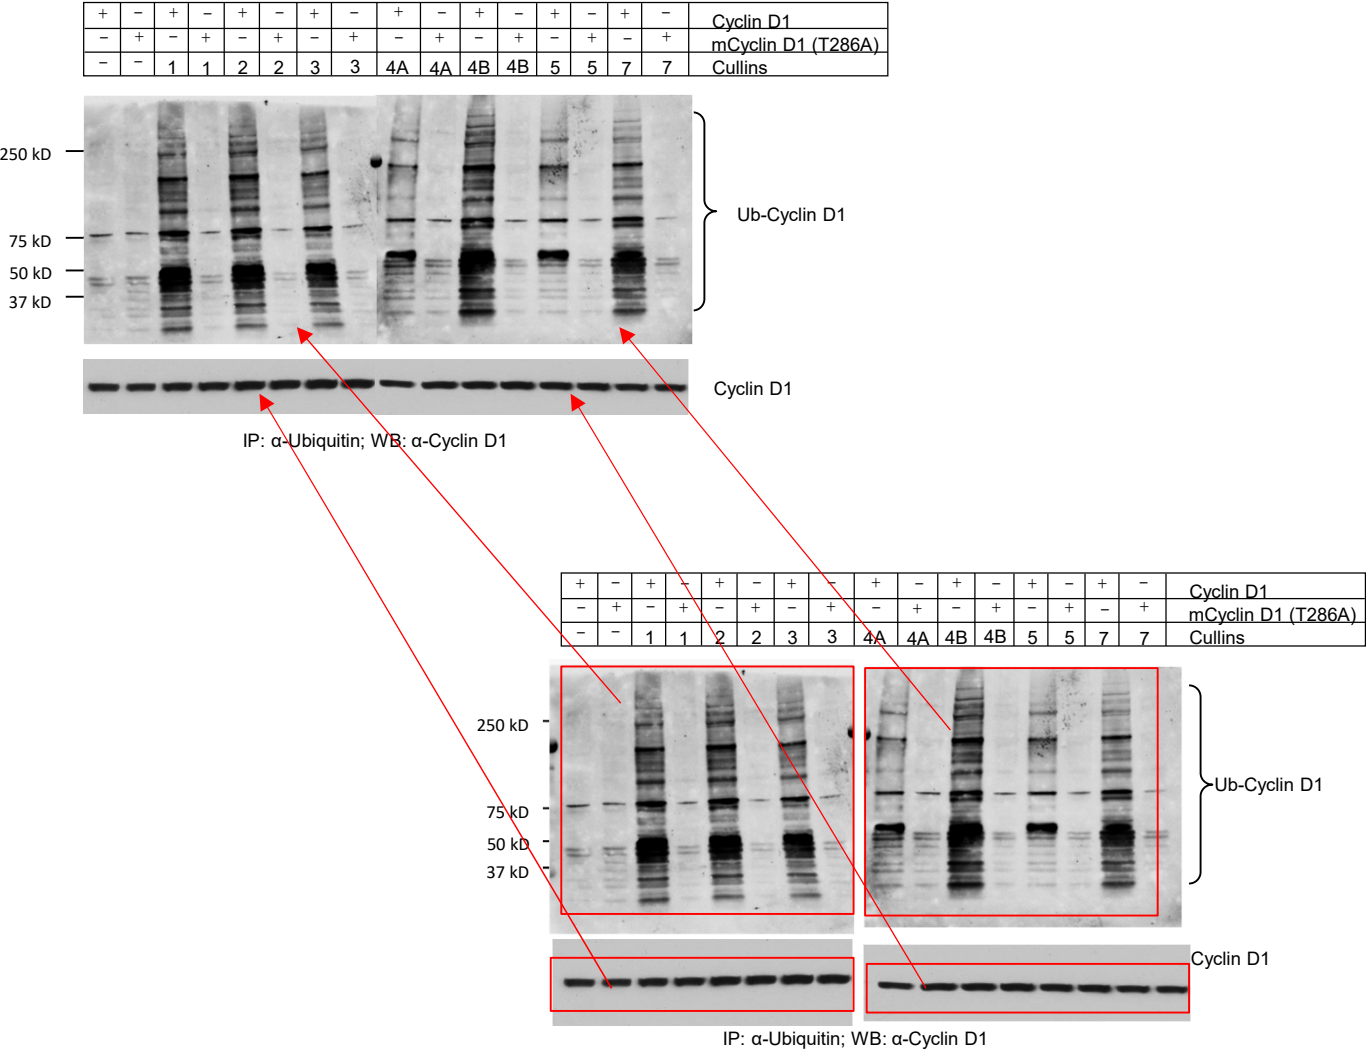

Supplement: supp [file elife-80327-supp-v1.zip]

**Figure 1-figure supplement 1A**

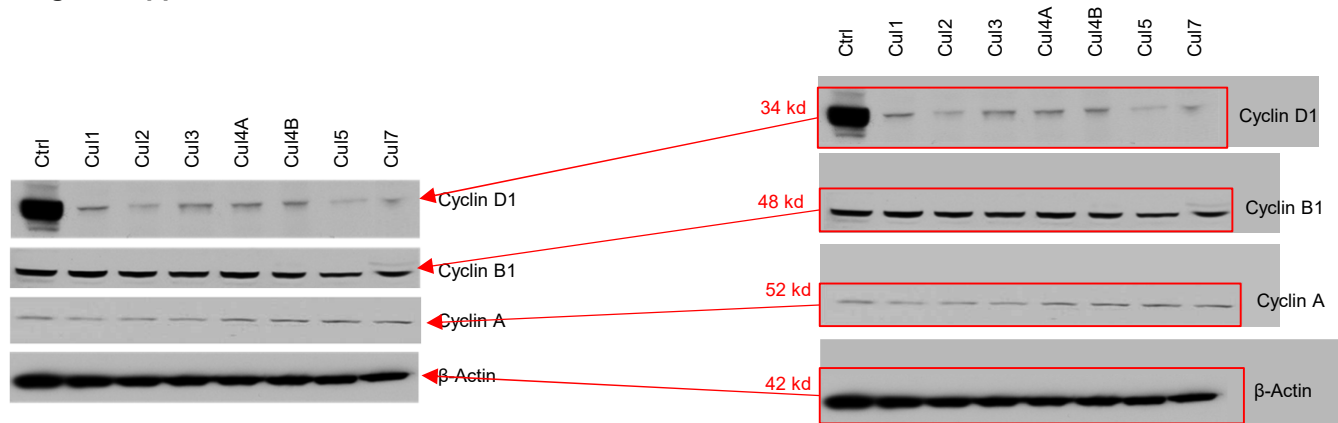

**Figure 1-figure supplement 1B**

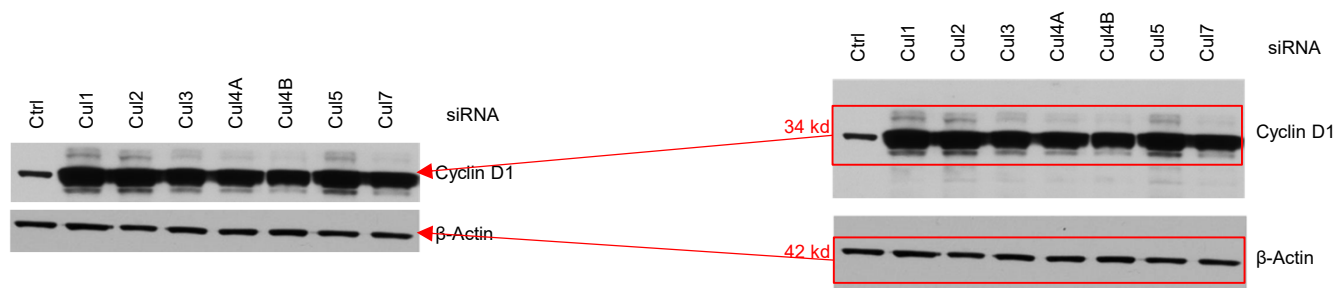

Supplement: supp [file elife-80327-supp-v1.zip]

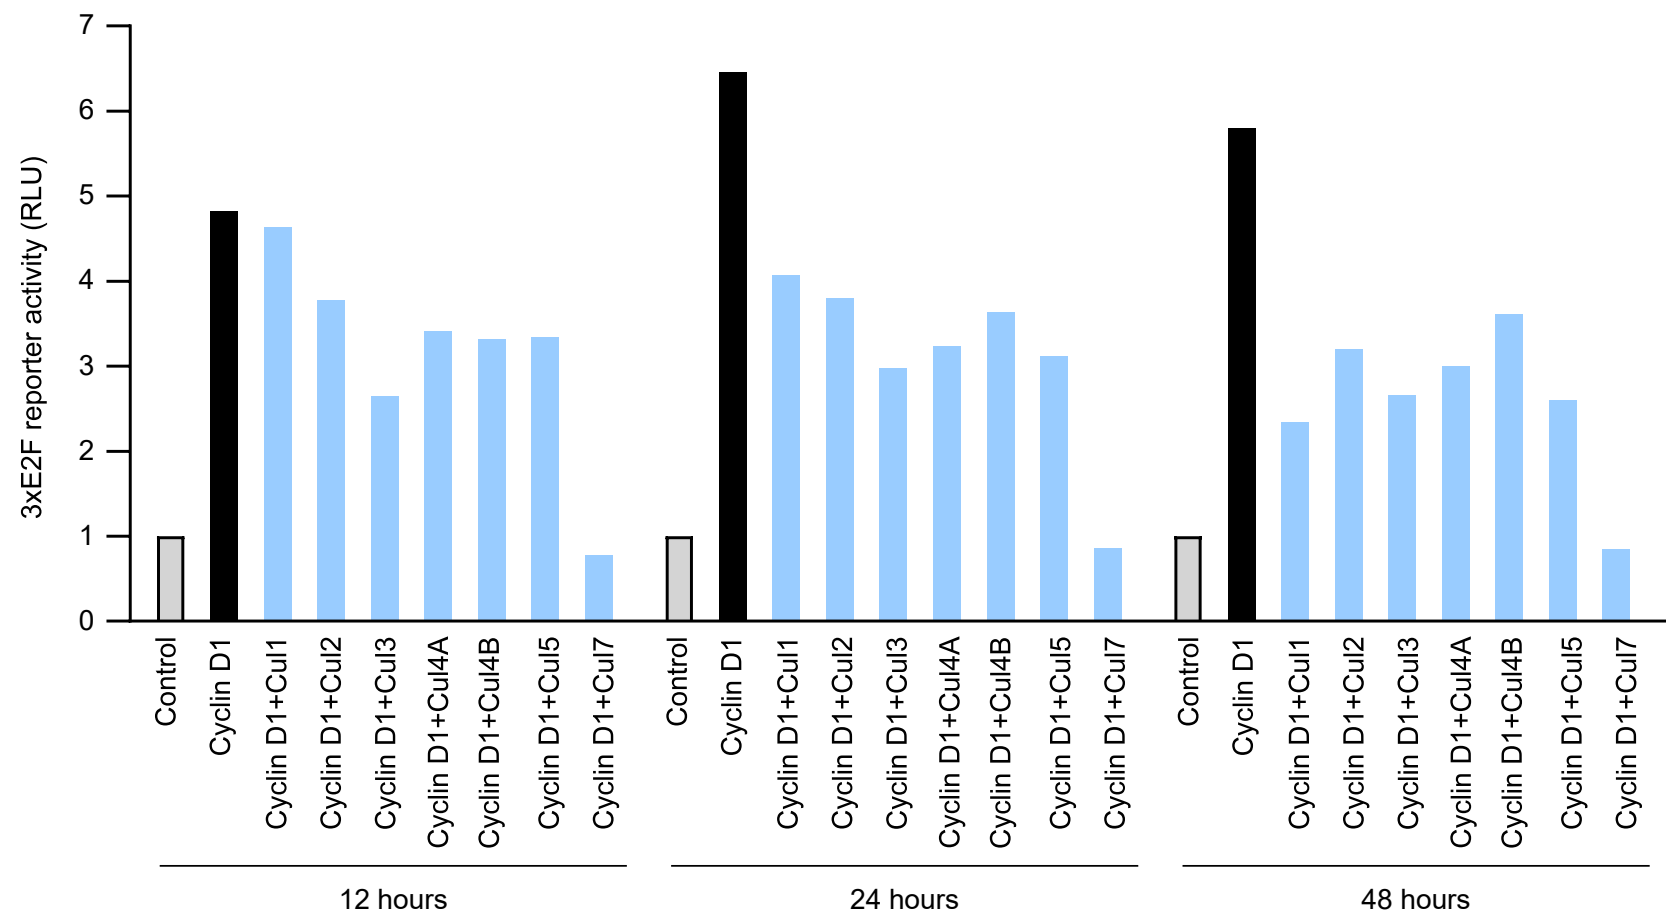

Supplement: supp [file elife-80327-supp-v1.zip]

|   |   |   |   |    |    |   |   |              |
|---|---|---|---|----|----|---|---|--------------|
| C | 1 | 2 | 3 | 4A | 4B | 5 | 7 | Cullin siRNA |
|---|---|---|---|----|----|---|---|--------------|

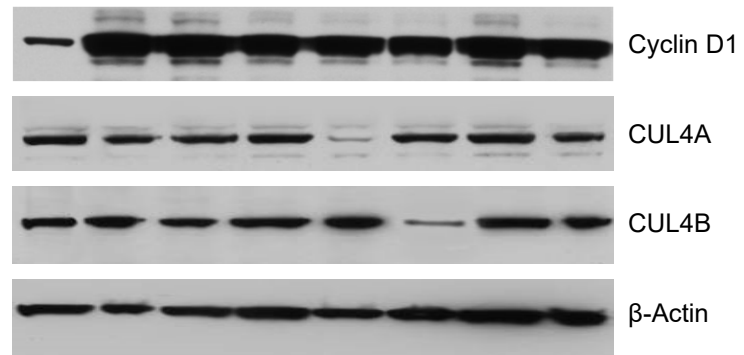

Supplement: supp [file elife-80327-supp-v1.zip]

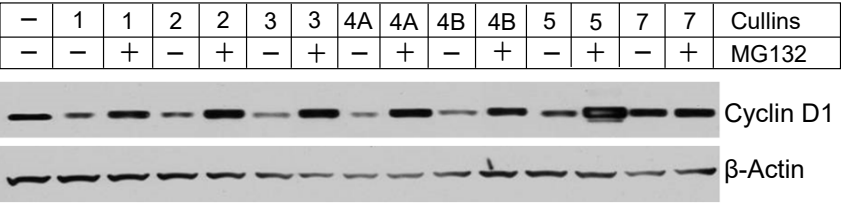

HEK293 cells

Supplement: supp [file elife-80327-supp-v1.zip]

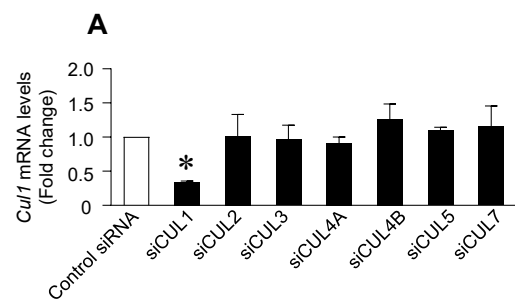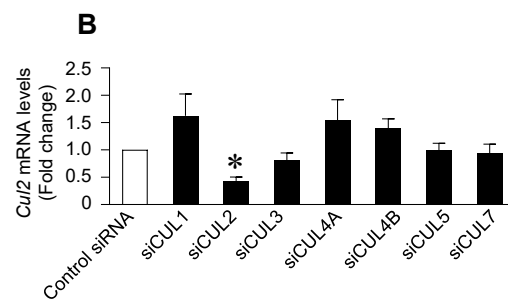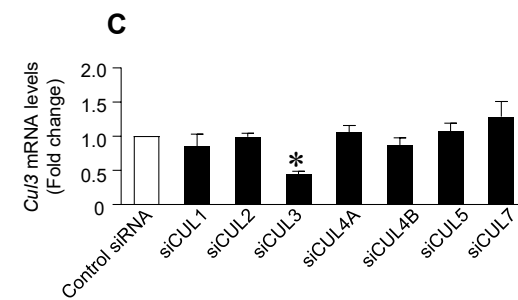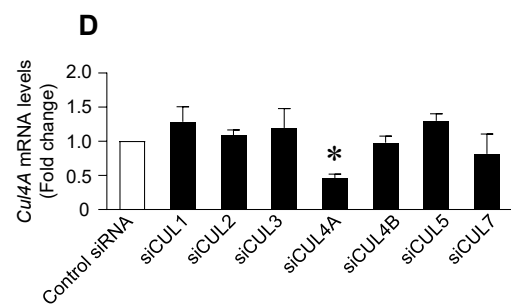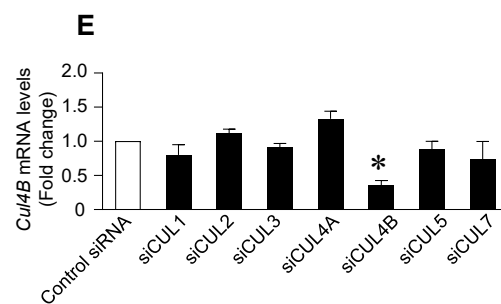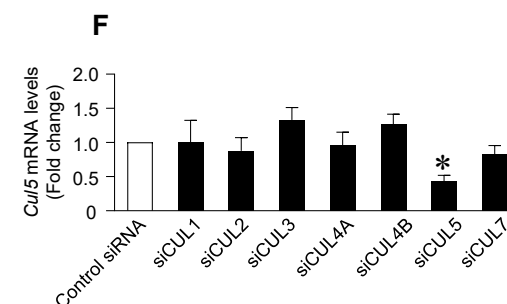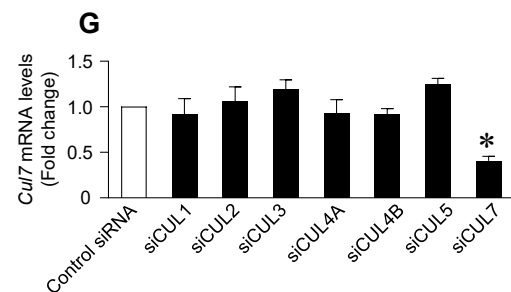

Supplement: supp [file elife-80327-supp-v1.zip]
